# Supplementary material
Source: publisher figshare collection journal article supplement (https://asha.figshare.com/articles/dataset/_/19497803)
Supplement: Supplementary file 1 [file 1]

**Supplemental Material S2.** Types of outcome measures reported across domains of the Speech Outcome Reporting Taxonomy (SORT) for 220 peer-reviewed published articles on intervention for children with phonological impairment.<sup>1</sup>

| Authors <sup>2</sup>            | Year              | N  | Age <sup>3</sup><br>(min) | Age<br>(max)    | Domains of the Speech Outcome Reporting Taxonomy <sup>4</sup> |        |    |    |   |        |        |                |                |                | Tidier<br>Rating <sup>6</sup> |
|---------------------------------|-------------------|----|---------------------------|-----------------|---------------------------------------------------------------|--------|----|----|---|--------|--------|----------------|----------------|----------------|-------------------------------|
|                                 |                   |    |                           |                 | 1                                                             | 2a     | 2b | 2c | 3 | 4      | 5      | 6 <sup>5</sup> | 7 <sup>5</sup> | 8 <sup>5</sup> |                               |
| Adams et al.                    | 2000              | 65 | 42                        | 60              |                                                               | S      |    |    |   | S, Oth |        |                |                |                | 63.6%*;<br>54.6%*             |
| Allen                           | 2013              | 54 | 36                        | 65              |                                                               |        |    |    |   | S      |        |                |                |                | 100.0%*;<br>100.0%**          |
| Almost & Rosenbaum              | 1998              | 26 | 33                        | 61              |                                                               |        |    |    |   | S, Oth | S      |                |                |                | 54.6%*                        |
| Alsaad et al.                   | 2019              | 1  | 50                        | 50              | S                                                             |        |    |    |   | S      |        |                |                |                | 81.8%*                        |
| Bagetti et al.                  | 2012              | 7  | 46                        | 81              |                                                               | S      | S  |    |   | S      |        |                |                |                | 36.4%*                        |
| Baker & McLeod                  | 2004              | 2  | 52                        | 57              | S                                                             | S      | S  |    |   |        |        |                |                |                | 72.7%*                        |
| Barberena et al.                | 2014              | 8  | 65 <sup>m</sup>           | 65 <sup>m</sup> |                                                               | S      | S  |    |   |        |        |                |                |                | 54.6%*                        |
| Barlow                          | 2005              | 4  | 45                        | 45              | S                                                             |        | S  |    |   |        |        |                |                |                | 72.7%*                        |
| Bedore et al.                   | 1994              | 1  | 52                        | 52              | S                                                             | S      | S  |    |   |        |        |                |                |                | 72.7%*                        |
| Bellon-Harn & Credeur-Pampolina | 2016              | 2  | 64                        | 67              | S                                                             | S      |    |    |   | S      | S      |                |                |                | 90.9%*                        |
| Bellon-Harn et al.              | 2013              | 2  | 50                        | 56              |                                                               |        |    |    |   | S, Oth |        |                |                |                | 100.0%*                       |
| Bellon-Harn et al.              | 2004              | 3  | 68                        | 70              | S, Oth                                                        | S, Oth |    |    |   | S      |        |                |                |                | 72.7%*                        |
| Bernhardt                       | 1992              | 1  | 70                        | 70              | S                                                             | S      | S  |    |   |        |        |                |                |                | 54.6%*                        |
| Bernhardt & Gilbert             | 1992              | 1  | 40                        | 40              | S                                                             | S      | S  |    |   |        |        |                |                |                | 54.6%*;<br>54.6%*             |
| Bernhardt & Major               | 2005              | 12 | 73                        | 101             |                                                               |        |    |    |   | S, Oth | S, Oth |                |                |                | 72.7%*;<br>72.7%*             |
| Blache et al.                   | 1981              | 7  | 64                        | 79              |                                                               |        | S  |    |   |        |        |                |                |                | 45.5%*                        |
| Bowen & Cupples                 | 1999 <sup>a</sup> | 22 | 35                        | 48              |                                                               |        |    |    |   | S, T   |        |                |                |                | 72.7%*                        |
| Bowen & Cupples                 | 1999 <sup>b</sup> | 1  | 53                        | 53              | S                                                             | S      | S  |    |   | S      | S, Oth |                |                |                | 63.6%*                        |
| Bowen & Cupples                 | 1998              | 1  | 52                        | 52              |                                                               | S      | S  |    |   | S      | S, Oth |                |                |                | 63.6%*                        |
| Broen & Westman                 | 1990              | 20 | 43                        | 60              |                                                               | S      |    |    |   |        | S      |                |                |                | 63.6%*                        |

| Authors <sup>2</sup>       | Year | N   | Age <sup>3</sup><br>(min) | Age<br>(max) | Domains of the Speech Outcome Reporting Taxonomy <sup>4</sup> |    |    |    |     |        |   |                |                |                | Tidier<br>Rating <sup>6</sup> |
|----------------------------|------|-----|---------------------------|--------------|---------------------------------------------------------------|----|----|----|-----|--------|---|----------------|----------------|----------------|-------------------------------|
|                            |      |     |                           |              | 1                                                             | 2a | 2b | 2c | 3   | 4      | 5 | 6 <sup>5</sup> | 7 <sup>5</sup> | 8 <sup>5</sup> |                               |
| Broomfield & Dodd          | 2011 | 730 | 0                         | 132          |                                                               |    |    |    |     | S      |   |                |                |                | 54.6%*                        |
| Bryan & Howard             | 1992 | 1   | 58                        | 58           | S                                                             | S  |    |    |     | Oth    |   |                |                |                | 54.6%*                        |
| Camaratta                  | 1993 | 2   | 46                        | 51           | S                                                             |    |    | S  |     |        |   | D              |                |                | 91.70%                        |
| Ceron & Keske-Soares       | 2013 | 5   | 50                        | 107          |                                                               | S  | S  |    | S   |        |   |                |                |                | 63.6%*                        |
| Ceron & Keske-Soares       | 2012 | 5   | 50                        | 107          |                                                               |    |    |    | S   |        |   |                |                |                | 45.5%*                        |
| Ceron et al.               | 2010 | 21  | 67                        | 67           |                                                               | S  | S  |    | S   |        |   |                |                |                | 27.2%*;<br>27.2%*;<br>27.2%*  |
| Ceron et al.               | 2013 | 94  | 45                        | 101          |                                                               |    |    |    | S   |        |   |                |                |                | 36.4%*;<br>36.4%*;<br>36.4%*  |
| Checalin et al.            | 2010 | 3   | 72                        | 84           |                                                               |    | S  |    | S   |        |   |                |                |                | 27.2%*                        |
| Combiths et al.            | 2019 | 1   | 62                        | 62           |                                                               |    | S  |    | S   |        |   |                |                |                | 72.7%*                        |
| Conture et al.             | 1993 | 8   | 54                        | 85           |                                                               | S  |    |    | Oth |        |   |                |                |                | 63.6%*                        |
| Crosbie et al.             | 2005 | 18  | 56                        | 77           |                                                               |    |    |    | S   |        |   |                |                |                | 81.8%*;<br>81.8%*             |
| Crosbie et al.             | 2006 | 1   | 84                        | 84           |                                                               |    |    |    | S   |        |   |                |                |                | 81.8%*                        |
| Cullata et al.             | 2005 | 1   | 69                        | 69           |                                                               |    |    |    | S   |        |   |                |                |                | 72.7%*                        |
| Cummings & Barlow          | 2011 | 4   | 36                        | 81           | S                                                             | S  | S  |    |     |        |   |                |                |                | 72.7%*                        |
| Cummings et al.            | 2019 | 24  | 42                        | 82           | S                                                             | S  |    |    | S   |        |   |                |                |                | 81.8%*                        |
| Dean et al.                | 1995 | 13  | 43                        | 55           |                                                               | S  | S  |    |     |        |   |                |                |                | 72.7%*                        |
| Denne et al.               | 2005 | 20  | 60                        | 84           |                                                               |    |    |    | S   | S, Oth |   |                |                |                | 72.7%*                        |
| Dinnsen & Gierut           | 2008 | 1   | 59                        | 59           | T                                                             | S  | S  |    |     |        |   |                |                |                | 45.5%*                        |
| Dinnsen et al.             | 1992 | 34  | 40                        | 80           | T                                                             |    |    |    | S   |        |   |                |                |                | 45.5%*                        |
| Dodd & Barker <sup>7</sup> | 1990 | 11  | 25                        | 59           |                                                               | S  | S  |    | S   |        | S |                |                |                | 63.6%*;<br>63.6%*             |
| Dodd & Bradford            | 2000 | 3   | 41                        | 51           | S                                                             | S  | S  |    | S   | Oth    |   |                |                |                | 54.6%*;<br>54.6%*;<br>54.6%*  |

| Authors <sup>2</sup>     | Year | N   | Age <sup>3</sup><br>(min) | Age<br>(max) | Domains of the Speech Outcome Reporting Taxonomy <sup>4</sup> |        |        |    |        |        |   |                |                |                | Tidier<br>Rating <sup>6</sup> |
|--------------------------|------|-----|---------------------------|--------------|---------------------------------------------------------------|--------|--------|----|--------|--------|---|----------------|----------------|----------------|-------------------------------|
|                          |      |     |                           |              | 1                                                             | 2a     | 2b     | 2c | 3      | 4      | 5 | 6 <sup>5</sup> | 7 <sup>5</sup> | 8 <sup>5</sup> |                               |
| Dodd & Iacono            | 1989 | 7   | 36                        | 57           |                                                               |        | S      |    | S      | S      | S |                |                |                | 72.7%*                        |
| Dodd et al.              | 2008 | 19  | 47                        | 77           |                                                               |        |        |    | S      |        |   |                |                |                | 81.8%*;<br>81.8%*             |
| Donicht et al.           | 2011 | 4   | 48                        | 76           |                                                               | S      | S      |    | S      |        |   |                |                |                | 36.4%*;<br>36.4%*             |
| Duan & Zhang             | 2020 | 40  | 72                        | 89           |                                                               | S      |        |    |        |        |   |                |                |                | 18.2%*;<br>18.2%*             |
| Dunn & Baron             | 1982 | 1   | 59                        | 59           | S                                                             | S      | S, Oth |    |        |        |   |                |                |                | 63.6%*                        |
| Eikeseth & Næssert       | 2003 | 2   | 64                        | 72           | S                                                             | S      | S      |    | S      |        |   |                |                |                | 100.0%*                       |
| Eiserman et al.          | 1990 | 40  | 37                        | 58           |                                                               |        |        |    | S, Oth | S, Oth | S |                |                | M              | 81.8%*;<br>81.8%*             |
| Eiserman et al.          | 1992 | 40  | 37                        | 58           |                                                               |        |        |    |        | S, Oth |   |                |                | M              | 81.8%*;<br>81.8%*             |
| Elbert                   | 1983 | 1   | 46                        | 46           |                                                               | S      | S      |    | S      |        |   |                |                |                | 72.7%*                        |
| Elbert & McReynolds      | 1985 | 4   | 42                        | 57           | T                                                             | S      | S      |    |        |        |   |                |                |                | 54.6%*                        |
| Elbert et al.            | 1990 | 10  | 43                        | 69           |                                                               | S      |        |    | S      |        |   |                |                |                | 63.6%*                        |
| Elbert et al.            | 1991 | 19  | 42                        | 80           | T                                                             | T      |        |    |        |        |   |                |                |                | 72.7%*                        |
| Farquharson et al.       | 2020 | 126 | 60                        | 96           |                                                               |        |        |    | S      |        |   |                |                |                | 36.4%*                        |
| Feehan et al.            | 2015 | 2   | 79                        | 79           |                                                               | S, Oth | S      |    | S, Oth |        |   |                |                |                | 72.7%*;<br>72.7%*             |
| Fey & Stalker            | 1986 | 1   | 81                        | 81           |                                                               | S      | S, Oth |    |        |        |   |                |                |                | 72.7%*                        |
| Fey et al.               | 1994 | 26  | 40                        | 77           |                                                               |        |        |    | S      | Oth    |   |                |                |                | 54.6%*;<br>63.6%*             |
| Flanagan & Ttofari Eecen | 2018 | 5   | 39                        | 59           |                                                               |        |        |    | S      |        |   |                |                |                | 72.7%*                        |
| Flint & Costello Ingham  | 2005 | 7   | 48                        | 67           |                                                               | S      | S      |    |        |        |   |                |                |                | 58.30%                        |
| Forrest & Elbert         | 2001 | 4   | 59                        | 63           |                                                               | S      |        |    |        |        |   |                |                |                | 45.5%*                        |
| Forrest & Iuzzini-Seigel | 2008 | 10  | 39                        | 75           |                                                               | S      | S      |    |        |        |   |                |                |                | 72.7%*;<br>72.7%*             |
| Forrest et al.           | 1997 | 14  | 42                        | 69           |                                                               | S      |        |    |        |        |   |                |                |                | 63.6%*                        |

| Authors <sup>2</sup>             | Year              | N  | Age <sup>3</sup><br>(min) | Age<br>(max)    | Domains of the Speech Outcome Reporting Taxonomy <sup>4</sup> |        |        |    |        |   |   |                |                |                | Tidier<br>Rating <sup>6</sup> |
|----------------------------------|-------------------|----|---------------------------|-----------------|---------------------------------------------------------------|--------|--------|----|--------|---|---|----------------|----------------|----------------|-------------------------------|
|                                  |                   |    |                           |                 | 1                                                             | 2a     | 2b     | 2c | 3      | 4 | 5 | 6 <sup>5</sup> | 7 <sup>5</sup> | 8 <sup>5</sup> |                               |
| Forrest et al.                   | 2000              | 10 | 40                        | 54              |                                                               | S      |        |    | S      |   |   |                |                |                | 54.6%*                        |
| Geronikou et al.                 | 2019              | 1  | 50                        | 50              | S                                                             | S, Oth | S, Oth |    | S, Oth |   |   |                |                |                | 63.6%*                        |
| Gibbon et al.                    | 1992              | 1  | 48                        | 48              |                                                               |        |        |    | S      |   |   |                |                |                | 63.6%*                        |
| Gierut                           | 1989              | 1  | 55                        | 55              |                                                               | S      | S      |    |        |   |   |                |                |                | 72.7%*                        |
| Gierut                           | 1990              | 3  | 49                        | 58              |                                                               | S      | S      |    |        |   |   |                |                |                | 63.6%*;<br>63.6%*             |
| Gierut                           | 1991              | 3  | 50                        | 64              |                                                               | S      | S      |    |        |   |   |                |                |                | 72.7%*;<br>72.7%*             |
| Gierut                           | 1992              | 4  | 42                        | 60              |                                                               | S      | S      |    |        |   |   |                |                |                | 72.7%*;<br>72.7%*             |
| Gierut                           | 1994              | 15 | 41                        | 68              |                                                               |        |        |    | S      | S |   |                |                |                | 27.3%*                        |
| Gierut                           | 1996              | 7  | 40                        | 68              |                                                               |        |        |    | S      |   |   |                |                |                | 45.5%*                        |
| Gierut                           | 1998              | 6  | 38                        | 87              |                                                               | S      | S      |    |        |   |   |                |                |                | 63.6%*                        |
| Gierut <sup>7</sup>              | 1999              | 11 | 38                        | 92              | S                                                             | S      | S      |    |        |   |   |                |                |                | 72.7%*;<br>72.7%*             |
| Gierut & Champion                | 1999              | 2  | 48                        | 56              |                                                               | S      | S      |    |        |   |   |                |                |                | 45.5%*                        |
| Gierut & Champion                | 2000              | 1  | 53                        | 53              | S                                                             | S      | S      |    |        |   |   |                |                |                | 45.5%*                        |
| Gierut & Champion                | 2001              | 8  | 40                        | 75              | S                                                             | S      | S      |    | S      |   |   |                |                |                | 50.0%*                        |
| Gierut & Dinnsen                 | 1987              | 6  | 43                        | 54              |                                                               | S      | S      |    | S      |   |   |                |                |                | 36.4%*                        |
| Gierut & Morrisette              | 1996              | 2  | 53                        | 68              | S                                                             | S      |        |    | S      |   |   |                |                |                | 63.6%*                        |
| Gierut & Morrisette              | 2010              | 4  | 42                        | 67              | S                                                             |        |        |    |        |   |   |                |                |                | 90.9%*                        |
| Gierurt & Morrisette             | 2012 <sup>a</sup> | 10 | 46                        | 71              | S                                                             |        |        |    | S      |   |   |                |                |                | 54.6%*                        |
| Gierurt & Morrisette             | 2012 <sup>b</sup> | 8  | 36                        | 65              |                                                               |        |        |    | S      |   |   |                |                |                | 54.6%*                        |
| Gierut & Morrisette              | 2014              | 9  | 54 <sup>m</sup>           | 54 <sup>m</sup> | S, T                                                          | S      |        |    |        |   |   |                |                |                | 81.8%*                        |
| Gierut & Morrisette <sup>7</sup> | 2015              | 12 | 40                        | 65              | S                                                             | S      |        |    | S      |   |   |                |                |                | 90.9%*;<br>90.9%*             |
| Gierut & Neuman                  | 1992              | 1  | 56                        | 56              | S                                                             | S      | S      |    |        |   |   |                |                |                | 63.6%*;<br>63.6%*             |

| Authors <sup>2</sup>             | Year | N   | Age <sup>3</sup><br>(min) | Age<br>(max)    | Domains of the Speech Outcome Reporting Taxonomy <sup>4</sup> |        |    |    |        |     |   |                |                |                | Tidier<br>Rating <sup>6</sup> |
|----------------------------------|------|-----|---------------------------|-----------------|---------------------------------------------------------------|--------|----|----|--------|-----|---|----------------|----------------|----------------|-------------------------------|
|                                  |      |     |                           |                 | 1                                                             | 2a     | 2b | 2c | 3      | 4   | 5 | 6 <sup>5</sup> | 7 <sup>5</sup> | 8 <sup>5</sup> |                               |
| Gierut et al.                    | 1987 | 6   | 43                        | 54              |                                                               | S      | S  |    |        |     |   |                |                |                | 54.6%*                        |
| Gierut et al. <sup>7</sup>       | 1996 | 9   | 41                        | 66              |                                                               | S      | S  |    | S      |     |   |                |                |                | 54.6%*;<br>54.6%*             |
| Gierut et al.                    | 1999 | 12  | 36                        | 88              | S                                                             | S      |    |    |        |     |   |                |                |                | 45.5%*                        |
| Gierut et al.                    | 2010 | 60  | 37                        | 89              |                                                               | S      | S  |    |        |     |   |                |                |                | 45.5%*                        |
| Gierut et al.                    | 2015 | 135 | 36                        | 84              | S, T                                                          |        |    |    | S      |     |   |                |                |                | 81.8%*                        |
| Gildersleeve-Neumann & Goldstein | 2015 | 2   | 66                        | 68              |                                                               | S      | S  |    | S      |     |   |                |                |                | 72.7%*                        |
| Gillon                           | 2005 | 12  | 36                        | 47              |                                                               |        |    |    | S, Oth | Oth |   |                |                |                | 90.9%*;<br>90.9%*             |
| Gillon                           | 2000 | 91  | 60                        | 90              |                                                               |        |    |    | S, Oth | Oth |   |                |                |                | 72.7%*                        |
| Girolametto et al.               | 1997 | 25  | 23                        | 33              |                                                               |        |    |    | S, Oth |     |   |                |                |                | 81.8%*                        |
| Glaspey & MacLeod                | 2010 | 1   | 41                        | 41              |                                                               | S      |    |    |        | S   |   |                |                |                | 63.6%*                        |
| Glaspey & Stoel-Gammon           | 2005 | 1   | 43                        | 43              |                                                               | S      |    |    | S      | S   |   |                |                |                | 54.6%*                        |
| Glaspey & Stoel-Gammon           | 2007 | 1   | 48                        | 48              |                                                               |        |    |    | S      | S   |   |                |                |                | 45.5%*                        |
| Glogowska et al.                 | 2000 | 159 | 18                        | 42              |                                                               |        |    |    | S      | Oth |   | M              | M              |                | 36.4%*                        |
| Goldstein                        | 1996 | 1   | 41                        | 41              |                                                               | S      | S  |    | S      |     |   |                |                |                | 36.4%*                        |
| Grawburg & Rvachew               | 2007 | 10  | 57 <sup>m</sup>           | 57 <sup>m</sup> |                                                               | S      |    |    | Oth    |     |   |                |                |                | 45.5%*                        |
| Grunwell & Russell               | 1990 | 1   | 51                        | 51              |                                                               |        |    |    | S      |     |   | D              |                |                | 54.6%*                        |
| Grunwell et al.                  | 1988 | 1   | 60                        | 60              |                                                               |        |    |    | S      | S   |   |                |                |                | 54.6%*                        |
| Harbers et al.                   | 1999 | 4   | 41                        | 50              |                                                               | S, Oth |    |    |        |     |   |                |                |                | 81.8%*                        |
| Hart & Gonzalez                  | 2010 | 3   | 43                        | 59              | S                                                             | S      |    |    | S      |     |   |                |                |                | 100.0%*                       |
| Hesketh et al.                   | 2000 | 61  | 42                        | 60              |                                                               |        |    |    | S, Oth | S   |   |                |                |                | 63.6%*;<br>54.6%*             |
| Hesketh et al.                   | 2007 | 42  | 48                        | 54              |                                                               |        |    |    | S      | Oth |   |                |                |                | 70.0%**                       |
| Hodson                           | 1983 | 1   | 47                        | 47              |                                                               |        |    |    | S      |     |   |                |                |                | 63.6%*                        |
| Hodson et al.                    | 1989 | 1   | 60                        | 60              |                                                               |        |    |    | S      | S   |   |                |                |                | 54.6%*                        |

| Authors <sup>2</sup>          | Year | N   | Age <sup>3</sup><br>(min) | Age<br>(max)    | Domains of the Speech Outcome Reporting Taxonomy <sup>4</sup> |    |    |    |        |        |   |                |                |                | Tidier<br>Rating <sup>6</sup> |
|-------------------------------|------|-----|---------------------------|-----------------|---------------------------------------------------------------|----|----|----|--------|--------|---|----------------|----------------|----------------|-------------------------------|
|                               |      |     |                           |                 | 1                                                             | 2a | 2b | 2c | 3      | 4      | 5 | 6 <sup>5</sup> | 7 <sup>5</sup> | 8 <sup>5</sup> |                               |
| Hoffman et al.                | 1990 | 2   | 49                        | 49              |                                                               | S  |    |    | S, Oth | S, Oth |   |                |                |                | 72.7%*;<br>63.6%*             |
| Hoffman et al.                | 1996 | 1   | 40                        | 40              |                                                               |    |    |    | S, Oth | Oth    |   |                |                |                | 54.6%*                        |
| Holm & Dodd                   | 2001 | 2   | 56                        | 62              | S                                                             | S  | S  |    |        |        |   |                |                |                | 63.6%*;<br>36.4%*;<br>36.4%*  |
| Holm & Dodd                   | 1999 | 1   | 54                        | 54              | S                                                             |    | S  |    | S      |        |   |                |                |                | 63.6%*                        |
| Holm et al.                   | 1997 | 1   | 62                        | 62              |                                                               | S  | S  |    | S      |        |   |                |                |                | 63.6%*;<br>72.7%*             |
| Jarvis                        | 1989 | 1   | 57                        | 57              |                                                               |    |    |    | S      |        |   |                |                |                | 72.7%*                        |
| Jesus et al.                  | 2019 | 22  | 42                        | 75              |                                                               | S  |    |    | S      |        |   |                |                |                | 90.9%*;<br>90.9%*             |
| Keske-Soares et al.           | 2008 | 66  | 52                        | 98              |                                                               |    |    |    | S      |        |   |                |                |                | 36.4%*;<br>27.3%*;<br>36.4%*  |
| Klein                         | 1996 | 35  | 36                        | 70              |                                                               |    |    |    | T      | S      |   |                |                |                | 45.5%*;<br>54.6%*             |
| Kwiatkowski & Shriberg        | 1993 | 134 | 56 <sup>m</sup>           | 56 <sup>m</sup> | S                                                             |    |    |    |        | S      |   |                |                |                | 36.4%*                        |
| Lancaster et al. <sup>7</sup> | 2010 | 27  | 40                        | 70              |                                                               |    |    |    |        | S      |   |                |                |                | 63.6%*;<br>63.6%*             |
| Leahy & Dodd                  | 1987 | 1   | 44                        | 44              |                                                               | S  |    |    | S      |        |   |                |                |                | 63.6%*                        |
| Lee                           | 2018 | 2   | 58                        | 72              |                                                               | S  | S  |    | S      | S      | S |                |                |                | 72.7%*                        |
| Leite et al.                  | 2010 | 66  | 96                        | 132             |                                                               |    |    |    | S      |        |   |                |                |                | 9.1%*                         |
| Leite et al.                  | 2014 | 47  | 96                        | 132             |                                                               |    |    |    | S      |        |   |                |                |                | 36.4%*                        |
| Lousada et al.                | 2013 | 14  | 48                        | 79              |                                                               | S  |    |    | S      |        |   | D              |                |                | 90.9%*;<br>90.9%*             |
| Lousada et al.                | 2014 | 14  | 48                        | 79              |                                                               |    |    |    |        |        | S |                |                |                | 72.7%*;<br>72.7%*             |
| MacLeod & Glaspey             | 2014 | 3   | 36                        | 36              |                                                               | S  |    |    | S      | S      |   |                |                |                | 45.5%*                        |

| Authors <sup>2</sup>   | Year | N   | Age <sup>3</sup><br>(min) | Age<br>(max) | Domains of the Speech Outcome Reporting Taxonomy <sup>4</sup> |    |    |    |        |     |   |                |                |                | Tidier<br>Rating <sup>6</sup> |
|------------------------|------|-----|---------------------------|--------------|---------------------------------------------------------------|----|----|----|--------|-----|---|----------------|----------------|----------------|-------------------------------|
|                        |      |     |                           |              | 1                                                             | 2a | 2b | 2c | 3      | 4   | 5 | 6 <sup>5</sup> | 7 <sup>5</sup> | 8 <sup>5</sup> |                               |
| Major & Bernhardt      | 1998 | 19  | 36                        | 59           |                                                               |    |    |    | S      | Oth |   |                |                |                | 63.6%*;<br>63.6%*             |
| Masterson & Daniels    | 1991 | 1   | 44                        | 44           |                                                               | S  |    |    |        |     |   |                |                |                | 72.7%*;<br>72.7%*             |
| McIntosh & Dodd        | 2008 | 3   | 45                        | 51           | T                                                             | S  |    |    | S      |     |   |                |                |                | 72.7%*                        |
| McKean et al.          | 2012 | 20  | 39                        | 58           | Oth                                                           |    |    |    | S      | Oth |   |                |                |                | 63.6%*                        |
| McLeod & Isaac         | 1995 | 1   | 60                        | 60           |                                                               | S  |    |    |        | S   |   |                |                |                | 36.4%*                        |
| McLeod et al.          | 2017 | 123 | 48                        | 64           |                                                               |    |    |    | S      | Oth | S | M              | M              |                | 90.9%*                        |
| McLeod et al.          | 2020 | 101 | 36                        | 72           |                                                               |    |    |    | S      | Oth | S |                |                |                | 72.7%*;<br>54.6%*;<br>63.4%*  |
| Mecrow et al.          | 2010 | 35  | 50                        | 82           |                                                               | S  | S  |    | S      | Oth |   | D              |                |                | 63.6%*                        |
| Miccio & Elbert        | 1996 | 1   | 40                        | 40           |                                                               | S  | S  |    |        |     |   |                |                |                | 63.6%*                        |
| Miccio & Ingrisano     | 2000 | 1   | 63                        | 63           | S                                                             | S  | S  |    | S      |     |   |                |                |                | 72.7%*                        |
| Miccio et al.          | 1999 | 4   | 46                        | 67           | S                                                             | S  | S  |    | S      |     |   |                |                |                | 63.6%*                        |
| Monahan                | 1986 | 4   | 65                        | 68           |                                                               | S  |    |    | S      | S   |   |                |                |                | 72.7%*                        |
| Montgomery & Bonderman | 1989 | 9   | 37                        | 58           |                                                               |    |    |    | S      | S   | S |                |                |                | 63.6%*                        |
| Morrisette & Gierut    | 2002 | 8   | 46                        | 64           |                                                               | S  | S  |    |        |     |   |                |                |                | 45.5%*                        |
| Mota et al.            | 2005 | 4   | 63                        | 89           |                                                               | S  | S  |    |        |     |   |                |                |                | 36.4%*                        |
| Mota et al.            | 2007 | 21  | 48                        | 94           |                                                               |    |    |    | S      |     |   |                |                |                | 27.3%*;<br>27.3%*;<br>27.3%*  |
| Murphy et al.          | 2015 | 17  | 84                        | 144          |                                                               |    |    |    | S, Oth | Oth |   |                |                |                | 60.0%**;<br>60.0%**           |
| Olswang & Bain         | 1985 | 3   | 48                        | 57           |                                                               | S  |    |    |        |     |   |                |                |                | 54.6%*                        |
| Ottow-Henning & Keij   | 2020 | 31  | 28                        | 46           |                                                               |    |    |    | S      |     |   |                |                |                | 54.6%*                        |
| Page et al.            | 1994 | 80  | 36                        | 70           |                                                               | S  |    |    |        |     |   |                |                |                | 63.6%*                        |

| Authors <sup>2</sup> | Year | N  | Age <sup>3</sup><br>(min) | Age<br>(max) | Domains of the Speech Outcome Reporting Taxonomy <sup>4</sup> |        |        |    |   |        |   |                |                |                | Tidier<br>Rating <sup>6</sup> |
|----------------------|------|----|---------------------------|--------------|---------------------------------------------------------------|--------|--------|----|---|--------|---|----------------|----------------|----------------|-------------------------------|
|                      |      |    |                           |              | 1                                                             | 2a     | 2b     | 2c | 3 | 4      | 5 | 6 <sup>5</sup> | 7 <sup>5</sup> | 8 <sup>5</sup> |                               |
| Pagliarin et al.     | 2009 | 9  | 50                        | 78           |                                                               |        |        |    | S |        |   |                |                |                | 36.4%*;<br>36.4%*;<br>36.4%*  |
| Pagliarin et al.     | 2011 | 9  | 50                        | 78           |                                                               | S      | S      |    | S |        |   |                |                |                | 36.4%*;<br>36.4%*;<br>36.4%*  |
| Pagliarin et al.     | 2012 | 10 | 51                        | 87           |                                                               |        | S      |    |   |        |   |                |                |                | 58.3%;<br>50.0%               |
| Palle et al.         | 2014 | 6  | 49                        | 67           |                                                               | S, T   | S      |    |   |        |   |                |                |                | 45.5%*;<br>45.5%*;<br>45.5%*  |
| Pascoe et al.        | 2018 | 1  | 36                        | 36           |                                                               | S      | S      |    | S |        | S |                |                |                | 66.70%                        |
| Pascoe et al.        | 2005 | 1  | 77                        | 77           | S, Oth                                                        | S, Oth | S, Oth |    | S | S, Oth |   |                |                |                | 66.70%                        |
| Penney et al.        | 1994 | 1  | 59                        | 59           | S, Oth                                                        |        |        |    | S |        |   |                |                |                | 45.5%*                        |
| Petinou & Theodorou  | 2019 | 1  | 54                        | 54           |                                                               |        |        |    | S |        | S |                |                |                | 72.7%*                        |
| Pieretti et al.      | 2015 | 2  | 49                        | 51           |                                                               | S      | S      |    |   | Oth    |   |                |                |                | 54.6%*;<br>63.6%*             |
| Pollock              | 1983 | 1  | 41                        | 41           | S                                                             |        |        |    | S |        |   |                |                |                | 36.4%*                        |
| Powell               | 1991 | 1  | 68                        | 68           | S                                                             | S      | S      |    |   |        |   |                |                |                | 45.5%*                        |
| Powell               | 1993 | 6  | 59                        | 66           | S                                                             | S      | S      |    | S |        |   |                |                |                | 45.5%*                        |
| Powell & Elbert      | 1984 | 6  | 52                        | 75           |                                                               | S      | S      |    |   |        |   |                |                |                | 45.5%*                        |
| Powell et al.        | 1991 | 6  | 59                        | 66           | S, T                                                          | S      | S      |    |   |        |   |                |                |                | 63.6%*                        |
| Powell et al.        | 1998 | 18 | 42                        | 82           | T                                                             | S      |        |    |   | S      |   |                |                |                | 45.5%*;<br>45.5%*             |
| Powell et al.        | 1999 | 5  | 46                        | 69           | S                                                             | S      | S      |    | S |        |   |                |                |                | 50.00%                        |
| Qiu et al.           | 2004 | 24 | 48                        | 300          | S, T                                                          |        |        |    |   |        |   |                |                |                | 18.2%*                        |
| Ray                  | 2002 | 1  | 60                        | 60           |                                                               | S      |        |    | S | S      | S |                |                |                | 63.6%*                        |
| Robb et al.          | 1999 | 1  | 48                        | 48           |                                                               | S      | S      |    | S |        |   |                |                |                | 54.6%*                        |
| Rossouw & Pascoe     | 2018 | 1  | 50                        | 50           |                                                               | S      | S      |    | S |        |   |                |                |                | 54.6%*                        |



| Authors <sup>2</sup>        | Year | N  | Age <sup>3</sup><br>(min) | Age<br>(max) | Domains of the Speech Outcome Reporting Taxonomy <sup>4</sup> |        |        |    |        |     |   |                |                |                | Tidier<br>Rating <sup>6</sup>           |
|-----------------------------|------|----|---------------------------|--------------|---------------------------------------------------------------|--------|--------|----|--------|-----|---|----------------|----------------|----------------|-----------------------------------------|
|                             |      |    |                           |              | 1                                                             | 2a     | 2b     | 2c | 3      | 4   | 5 | 6 <sup>5</sup> | 7 <sup>5</sup> | 8 <sup>5</sup> |                                         |
| Rudolph & Wendt             | 2014 | 3  | 51                        | 63           |                                                               | S      |        |    | S      |     |   |                |                |                | 72.7%*                                  |
| Ruscello                    | 1995 | 36 | 96                        | 144          | S                                                             |        |        |    |        |     |   |                |                |                | 36.4%*;<br>36.4%*;<br>18.2%*;<br>18.2%* |
| Ruscello et al.             | 1993 | 12 | 49                        | 68           |                                                               |        |        |    | S      |     |   |                |                |                | 72.7%*                                  |
| Rvachew                     | 1994 | 27 | 42                        | 66           | S                                                             | S, Oth |        |    |        |     |   |                |                |                | 83.30%                                  |
| Rvachew & Bernhardt         | 2010 | 6  | 41                        | 52           |                                                               |        |        |    | S      |     |   |                |                |                | 54.6%*                                  |
| Rvachew & Brosseau-Lapre    | 2015 | 72 | 48                        | 71           |                                                               |        |        |    | S      | Oth |   |                |                |                | 90.9%*;<br>90.9%*;<br>72.7%*;<br>72.7%* |
| Rvachew & Nowak             | 2001 | 48 | 49                        | 51           | S                                                             | S      | S      |    | S      | S   |   |                |                |                | 63.6%*                                  |
| Rvachew et al.              | 2004 | 34 | 41                        | 59           |                                                               |        |        |    | S, Oth |     |   |                |                |                | 63.6%*                                  |
| Rvachew et al. <sup>7</sup> | 1999 | 23 | 45                        | 59           |                                                               | S      |        |    |        |     |   |                |                |                | 63.6%*;<br>63.6%*                       |
| Saben & Costello-Ingham     | 1991 | 2  | 45                        | 52           | S                                                             | S      | S      |    |        |     |   |                |                |                | 75.00%                                  |
| Seef-Garbiel et al.         | 2012 | 1  | 61                        | 61           | S, Oth                                                        | S, Oth | S, Oth |    | Oth    |     |   |                |                |                | 63.6%*                                  |
| Shea & Tyler                | 2001 | 2  | 37                        | 43           |                                                               | S      | S      |    |        |     |   |                |                |                | 54.6%*                                  |
| Shiller et al.              | 2010 | 1  | 52                        | 52           | S                                                             | S      |        |    | S      |     |   |                |                |                | 45.5%*;<br>72.7%*                       |
| Shoaf et al.                | 2009 | 1  | 76                        | 76           | S                                                             | S      | S      |    |        |     | S |                |                |                | 63.6%*                                  |
| Shriberg & Kwiatkowski      | 1982 | 31 | 46                        | 108          | S, T                                                          |        |        |    |        |     |   |                |                |                | 63.6%*;<br>63.6%*                       |
| Shriberg & Kwiatkowski      | 1987 | 73 | 33                        | 114          |                                                               | S      |        |    | S      |     |   |                |                |                | 54.6%*                                  |
| Shriberg & Kwiatkowski      | 1990 | 8  | 44                        | 67           | S, T                                                          | S      | S      |    |        |     |   |                |                |                | 72.7%*                                  |
| Shriberg et al.             | 1989 | 18 | 42                        | 105          | S                                                             |        |        |    |        |     |   |                |                |                | 81.8%*;<br>81.8%*                       |

| Authors <sup>2</sup>         | Year | N  | Age <sup>3</sup><br>(min) | Age<br>(max) | Domains of the Speech Outcome Reporting Taxonomy <sup>4</sup> |        |        |    |        |     |   |                |                |                | Tidier<br>Rating <sup>6</sup> |
|------------------------------|------|----|---------------------------|--------------|---------------------------------------------------------------|--------|--------|----|--------|-----|---|----------------|----------------|----------------|-------------------------------|
|                              |      |    |                           |              | 1                                                             | 2a     | 2b     | 2c | 3      | 4   | 5 | 6 <sup>5</sup> | 7 <sup>5</sup> | 8 <sup>5</sup> |                               |
| Shriberg et al. <sup>7</sup> | 1990 | 20 | 35                        | 98           | S                                                             |        |        |    |        |     |   |                |                |                | 81.8%*;<br>81.8%*;<br>81.8%*  |
| Smit et al.                  | 2018 | 13 | 41                        | 60           |                                                               |        |        |    | S      |     |   |                |                |                | 90.91*<br>90.91*              |
| Smith et al.                 | 1998 | 18 | 68                        | 98           |                                                               |        |        |    |        | S   |   |                |                |                | 18.2%*;<br>36.4%*             |
| Speake et al.                | 2012 | 2  | 127                       | 127          |                                                               | S      |        |    | S      |     | S |                |                |                | 63.6%*                        |
| Stoel-Gammon et al.          | 2002 | 1  | 48                        | 48           |                                                               | S      |        |    | S      | S   |   |                |                |                | 45.5%*                        |
| Stringfellow & McLeod        | 1994 | 1  | 60                        | 60           |                                                               | S      |        |    |        |     |   |                |                |                | 54.6%*                        |
| Sugden et al.                | 2020 | 5  | 39                        | 71           | S                                                             | S      | S      |    | S      |     | S | M              |                |                | 100.0%*                       |
| Topbas & Unal                | 2010 | 2  | 72                        | 72           |                                                               | S      | S      |    | S      |     |   |                |                |                | 81.8%*;<br>81.8%*             |
| Tyler                        | 2002 | 11 | 58 <sup>9</sup>           | 58           |                                                               |        |        |    | S, Oth | Oth |   |                |                |                | 54.6%*                        |
| Tyler                        | 1995 | 6  | 47                        | 71           |                                                               | S      | S      |    | Oth    |     |   |                |                |                | 54.6%*                        |
| Tyler & Figurski             | 1994 | 2  | 32                        | 34           | S                                                             | S      | S      |    | S      |     |   |                |                |                | 63.6%*                        |
| Tyler & Lewis                | 2005 | 40 | 36                        | 71           |                                                               |        |        |    | S      |     |   |                |                |                | 63.6%*;<br>63.6%*             |
| Tyler & Sandoval             | 1994 | 6  | 42                        | 56           |                                                               | S      | S, Oth |    | Oth    | Oth |   |                |                |                | 63.6%*;<br>72.7%*;<br>63.6%*  |
| Tyler & Watterson            | 1991 | 12 | 43                        | 67           |                                                               | Oth    |        |    | S, Oth |     |   |                |                |                | 45.5%*;<br>54.6%*             |
| Tyler et al.                 | 1987 | 4  | 37                        | 61           |                                                               | S      | S      |    |        |     |   |                |                |                | 63.6%*;<br>63.6%*             |
| Tyler et al.                 | 1990 | 4  | 58                        | 63           |                                                               | S      | S      |    | S      |     |   |                |                |                | 63.6%*                        |
| Tyler et al.                 | 1993 | 7  | 46                        | 66           | T                                                             | S      | S      |    |        |     |   |                |                |                | 63.6%*                        |
| Tyler et al.                 | 2011 | 30 | 46                        | 62           |                                                               | S, Oth |        |    | S, Oth | Oth |   |                |                |                | 100.0%*;<br>90.9%*            |

| Authors <sup>2</sup> | Year              | N  | Age <sup>3</sup><br>(min) | Age<br>(max) | Domains of the Speech Outcome Reporting Taxonomy <sup>4</sup> |        |    |     |        |     |   |                |                |                | Tidier<br>Rating <sup>6</sup> |
|----------------------|-------------------|----|---------------------------|--------------|---------------------------------------------------------------|--------|----|-----|--------|-----|---|----------------|----------------|----------------|-------------------------------|
|                      |                   |    |                           |              | 1                                                             | 2a     | 2b | 2c  | 3      | 4   | 5 | 6 <sup>5</sup> | 7 <sup>5</sup> | 8 <sup>5</sup> |                               |
| Tyler et al.         | 2002              | 27 | 36                        | 71           |                                                               | Oth    |    |     | S      |     |   |                |                |                | 72.7%*;<br>72.7%*             |
| Tyler et al.         | 2003              | 47 | 36                        | 71           |                                                               | Oth    |    |     | S      |     |   |                |                |                | 72.7%*;<br>63.6%*             |
| Tyler et al.         | 2003              | 40 | 36                        | 71           |                                                               | Oth    |    |     | S      |     |   |                |                |                | 72.7%*;<br>72.7%*             |
| Tyler et al.         | 2006              | 20 | 24                        | 71           |                                                               | S      |    |     | S      | S   |   |                |                |                | 63.6%*;<br>63.6%*             |
| Unicomb et al.       | 2017              | 5  | 42                        | 55           | T                                                             |        |    | Oth | S, Oth | Oth |   |                |                |                | 54.6%*                        |
| Unicomb et al.       | 2020              | 4  | 82                        | 91           |                                                               |        |    | Oth | S, Oth | Oth |   |                |                |                | 54.6%*                        |
| Waters et al.        | 1998              | 1  | 60                        | 60           |                                                               |        |    |     |        |     |   | D              |                |                | 27.3%*                        |
| Weiner               | 1981              | 2  | 52                        | 58           | S                                                             | S      |    |     |        |     |   |                |                |                | 63.6%*                        |
| Williams             | 1991              | 9  | 44                        | 69           |                                                               | S      | S  |     |        |     |   |                |                |                | 54.6%*                        |
| Williams             | 2000 <sup>a</sup> | 1  | 41                        | 41           | S                                                             | S      |    |     | S      |     |   |                |                |                | 45.5%*                        |
| Williams             | 2000 <sup>b</sup> | 10 | 48                        | 77           | T                                                             |        | T  |     | S      |     |   |                |                |                | 54.6%*                        |
| Williams             | 2005              | 1  | 77                        | 77           | S                                                             | S      | S  |     | S      |     |   |                |                |                | 54.6%*;<br>54.6%*             |
| Williams             | 2012              | 22 | 43                        | 72           | T                                                             |        |    |     | S      |     |   |                |                |                | 45.5%*;<br>45.5%*;<br>54.6%*  |
| Wolfe et al.         | 1988              | 2  | 41                        | 55           | S                                                             | S      |    |     |        |     |   |                |                |                | 27.3%*                        |
| Wolfe et al.         | 2003              | 9  | 41                        | 50           |                                                               | S, Oth |    |     |        | Oth |   |                |                |                | 45.5%*;<br>72.7%*             |
| Wren & Roulstone     | 2008              | 33 | 50                        | 94           |                                                               | S      |    |     | S      | S   |   |                |                |                | 72.7%*;<br>63.6%*             |
| Wren et al.          | 2001              | 23 | NR                        | NR           |                                                               |        |    |     | S      | Oth |   | D              |                | D              | 27.3%*                        |
| Yoder et al.         | 2005              | 52 | 43                        | 43           | Oth                                                           |        |    |     | Oth    |     | S |                |                |                | 81.8%*                        |
| Young                | 1987              | 2  | 52                        | 53           | S                                                             | S      |    |     | S      |     |   |                |                |                | 58.30%*                       |

Note. <sup>1</sup> In this systematic search and review the term *phonological impairment* served as a cover term for a range of terms or diagnostic labels across four decades of research to refer to children reported to have difficulty learning the phonological system of their language.

<sup>2</sup>For formatting purposes, the first author is indicated for articles reporting three or more authors in keeping with APA 7th Edition Guidelines.

<sup>3</sup>Ages reported in whole months. The minimum and maximum age is the same for articles reporting a single case study or study involving twins.

<sup>4</sup>Speech Outcomes Reporting Taxonomy (SORT) Domains including 1 = Intervention data; 2a = Generalization of the intervention target to other response contexts (e.g., nontreatment words, other word positions, conversational speech); 2b = Generalization related to the target (e.g., generalization to other phonemes within and across sound classes); 2c = Stimulus generalization (e.g., generalization to other people and/or other places such as home or school); 3 = Broad measure of generalization in a meaningful context (e.g., percentage of consonants correct [PCC] during conversational speech or a single-word speech assessment; number of phonemes in the child's phonetic inventory); 4 = Broad measure of generalization based on a score (e.g., standard score or percentile rank); 5 = Intelligibility measure; 6 = Measure or description of activity and/or participation; 7 = Measure or description of the child's quality of life; 8 = Measure or description of the impact on others (family/others). Outcome domains 1–5 refer to measures of abilities: S = Speech production measure, T = Measure of Time to meet intervention criteria, Oth = Measure of another ability (i.e., not a measure of speech production). Outcome domains 6–8 refer to measure of the impact of the SSD: M = numerical measure in this domain, D = description capturing this domain.

<sup>5</sup>The tools used to measure the impact of intervention for Domains 6, 7, or 8 were as follows: Glogowska et al. (2000) used the Therapy Outcome Measures (TOMS) (Enderby & Johns, 1997) and McLeod et al. (2017) used the Australian Therapy Outcome Measures (AusTOMS; Perry et al., 2004) to measure children's activity and participation. These same articles also used these tools to report a broader measure of quality of life and/or well-being—Domain 7. McLeod et al. (2017) and Sugden et al. (2020) reported using the FOCUS (Thomas-Stonell et al., 2010) to measure children's activity and participation. McLeod et al. (2017) also reported using the Kiddy-Communication and Attitude Test (KiddyCAT; Vanryckeghem & Brutten, 2006) and Speech Participation and Activity Assessment of Children (SPAA-C; McLeod, 2004) as measures of children's participation and wellbeing. Measure of the impact of intervention on others (Domain 8) was reported by Eiserman and colleagues (1990, 1992) using the Parenting Stress Index (PSI; Abidin, 1990), and the Family Adaptability and Cohesion Evaluation Scales (FACES III; Olson et al. 1985).

<sup>6</sup>TIDieR refers to Hoffman and colleagues' (2014) Template for Intervention Description and Replication. The number of TIDieR ratings reported per article equates to the number of interventions reported in the article. All TIDieR percentages based on valid data. That is, where it may or may not have been appropriate to include an item on the checklist (e.g., Item # 9 on tailoring, and Item # 10 on modifications) this was not included, as we did not want to penalize a study for not including it, where it was not appropriate, in keeping with Sugden et al. (2016). Therefore, \*Tidier percentage based on 11 items deemed appropriate for the study; \*\*TIDieR percentage based on 10 items deemed appropriate for the study.

<sup>7</sup>Article reported > 1 study. Participant number and age range based on total participants in the article.

<sup>8</sup>Participants in Broomfield and Dodd (2011) were reported according to age groups, with the youngest age group 0 < 2 years, hence minimum age of 0.

<sup>9</sup>This is the age of the case study participant reported in Tyler (2002). Outcomes for another 10 children were reported, however their mean age or the age range was not reported.

<sup>m</sup>Mean; NR = not reported.

## References

- Abidin, R. R. (1990). *Parenting Stress Index (PSI)*. Pediatric Psychology Press.
- Adams, C., Nightingale, C., Hesketh, A., & Hall, R. (2000). Targeting metaphonological ability in intervention for children with developmental phonological disorders. *Child Language, Teaching and Therapy*, 16, 285–299. <https://doi.org/10.1177/026565900001600304>
- Allen, M. M. (2013). Intervention efficacy and intensity for children with speech sound disorder. *Journal of Speech, Language, and Hearing Research*, 56(3), 865–877. [https://doi.org/10.1044/1092-4388\(2012/11-0076\)](https://doi.org/10.1044/1092-4388(2012/11-0076))
- Almost, D., & Rosenbaum, P. (1998). Effectiveness of speech intervention for phonological disorders: A randomized controlled trial. *Developmental Medicine and Child Neurology*, 40, 319–325. <https://doi.org/10.1111/j.1469-8749.1998.tb15383.x>
- Alsaad, M., McCabe, P., & Purcell, A. (2019). The application of the maximal opposition therapy approach to an Arabic-speaking child. *Journal of Communication Disorders*, 81, 105913. <https://doi.org/10.1016/j.jcomdis.2019.105913>
- American Speech-Language-Hearing Association. (2015). *ASHA's National Outcomes Measurement System (NOMS)*. <http://www.asha.org/NOMS/>
- Bagetti, T., Ceron, M. I., Mota, H. B., & Keske-Soares, M. (2012). Phonological changes after the application of therapy approach based on distinctive features in the treatment of phonological disorder. *Jornal da Sociedade Brasileira de Fonoaudiologia*, 24(3), 282–287. <https://doi.org/10.1590/s2179-64912012000300015>
- Baker, E., & McLeod, S. (2004). Evidence-based management of phonological impairment in children. *Child Language Teaching and Therapy*, 20(3), 261–285. <https://doi.org/10.1191/0265659004ct275oa>
- Barberena, L., Keske-Soares, M., Cervi, T., & Brandão, M. (2014). Treatment model in children with speech disorders and its therapeutic efficiency. *International Archives of Otorhinolaryngology*, 18(3), 283–288. <https://doi.org/10.1055/s-0034-1376885>
- Barlow, J. A. (2005). Phonological change and the representation of consonant clusters in Spanish: A case study. *Clinical Linguistics & Phonetics*, 19(8), 659–679. <https://doi.org/10.1080/02699200412331279794>
- Bedore, L. M., Leonard, L. B., & Gandour, J. (1994). The substitution of a click for sibilants: A case study. *Clinical Linguistics & Phonetics*, 8(4), 283–293. <https://doi.org/10.3109/02699209408985313>
- Bellon-Harn, M. L., Credeur-Pampolina, M. E., & LeBoeuf, L. (2013). Scaffolded-language intervention: Speech production outcomes. *Communication Disorders Quarterly*, 34(2), 120–132. <https://doi.org/10.1177/1525740111425086>
- Bellon-Harn, M. L., Hoffman, P. R., & Harn, W. E. (2004). Use of cloze and contrast word procedures in repeated storybook reading: Targeting multiple domains. *Journal of Communication Disorders*, 37(1), 53–75. <https://doi.org/10.1016/j.jcomdis.2003.07.001>
- Bellon-Harn, M., & Credeur-Pampolina, M. (2016). Storybook Reading Approach: Outcomes with two children with language and phonological impairments exhibiting different levels of phonological consistency. *Contemporary Issues in Communication Science and Disorders*, 43(Spring), 1–10. [https://doi.org/10.1044/cicsd\\_43\\_S\\_1](https://doi.org/10.1044/cicsd_43_S_1)
- Bernhardt, B. (1992). The application of nonlinear phonological theory to intervention with one phonologically disordered child. *Clinical Linguistics & Phonetics*, 6(4), 283–316. <https://doi.org/10.3109/02699209208985537>
- Bernhardt, B., & Gilbert, J. (1992). Applying linguistic theory to speech-language pathology: The case for nonlinear phonology. *Clinical Linguistics & Phonetics*, 6(1–2), 123–145. <https://doi.org/10.3109/02699209208985523>
- Bernhardt, B., & Major, E. (2005). Speech, language, and literacy skills 3 years later: A follow-up study of early phonological and metaphonological intervention. *International Journal of Language & Communication Disorders*, 40(1), 1–27. <https://doi.org/10.1080/13682820410001686004>
- Blache, S. E., Parsons, C. L., & Humphreys, J. M. (1981). A minimal-word-pair model for teaching the linguistic significance of distinctive feature properties. *Journal of Speech and Hearing Disorders*, 46(3), 291–296. <https://doi.org/10.1044/jshd.4603.291>
- Bowen, C., & Cupples, L. (1998). A tested phonological therapy in practice. *Child Language Teaching and Therapy*, 14(1), 29–50. <https://doi.org/10.1177/026565909801400102>
- Bowen, C., & Cupples, L. (1999a). A phonological therapy in depth: A reply to commentaries. *International Journal of Language & Communication Disorders*, 34(1), 65–83. <https://doi.org/10.1080/136828299247649>

- Bowen, C., & Cupples, L. (1999b). Parents and children together (PACT): A collaborative approach to phonological therapy. *International Journal of Language & Communication Disorders*, 34(1), 35–55. <https://doi.org/10.1080/136828299247603>
- Broen, P. A., & Westman, M. J. (1990). Project parent: A preschool speech program implemented through parents. *Journal of Speech and Hearing Disorders*, 55, 495–502. <https://doi.org/10.1044/jshd.5503.495>
- Broomfield, J., & Dodd, B. (2011). Is speech and language therapy effective for children with primary speech and language impairment? Report of a randomized control trial. *International Journal of Language & Communication Disorders*, 46(6), 628–640. <https://doi.org/10.1111/j.1460-6984.2011.00039.x>
- Bryan, A., & Howard, D. (1992). Frozen phonology thawed: The analysis and remediation of a developmental disorder of real word phonology. *International Journal of Language & Communication Disorders*, 27(4), 343–365. <https://doi.org/10.3109/13682829209012045>
- Camarata S. (1993). The application of naturalistic conversation training to speech production in children with speech disabilities. *Journal of Applied Behavior Analysis*, 26(2), 173–182. <https://doi.org/10.1901/jaba.1993.26-173>
- Ceron, M. I., & Keske-Soares, M. (2012). Analysis of the therapeutic progress of children with phonological disorders after the application of the Multiple Oppositions Approach. *Jornal da Sociedade Brasileira de Fonoaudiologia*, 24(1), 91–95. <https://doi.org/10.1590/S2179-64912012000100016>
- Ceron, M. I., Keske-Soares, M., Freitas, G. P. d., & Gubiani, M. B. (2010). Phonological changes obtained in the treatment of subjects comparing different therapy models. *Pro-fono: Revista de atualizacao cientifica*, 22(4), 549–554. <https://doi.org/10.1590/s0104-56872010000400032>
- Ceron, M. I., Keske-Soares, M., Freitas, G. P., & Gubiani, M. B. (2010). Phonological changes obtained in the treatment of subjects comparing different therapy models. *Pro Fono*, 22(4), 549–554. <https://doi.org/10.1590/s0104-56872010000400032>
- Ceron, M. I., Pagliarin, K. C., & Keske-Soares, M. (2013). Advances in the treatment of children with phonological disorders. *International Archives of Otorhinolaryngology*, 17(2), 189–195. <https://doi.org/10.7162/s1809-97772013000200012>
- Ceron, M., & Keske-Soares, M. (2013). Phonological changes obtained in the treatment based on the multiple opposition approach. *Revista CEFAC*, 15, 314–323. <https://doi.org/10.1590/S1516-18462012005000083>
- Checalin, M. A., Ghisleni, M. R., Ferreira-Gonçalves, G., Keske-Soares, M., & Mota, H. B. (2010). Relapse observed in the treatment of phonological disorder. *Pro Fono*, 22(3), 363–366. <https://doi.org/10.1590/s0104-56872010000300034>
- Combiths, P. N., Barlow, J. A., & Sanchez, E. (2019). Quantifying phonological knowledge in children with phonological disorder. *Clinical Linguistics & Phonetics*, 33(10–11), 885–898. <https://doi.org/10.1080/02699206.2019.1584247>
- Conture, E. G., Louko, L. J., & Edwards, M. L. (1993). Simultaneously treating stuttering and disordered phonology in children: Experimental treatment, preliminary findings. *American Journal of Speech-Language Pathology*, 2, 72–81. <https://doi.org/10.1044/1058-0360.0203.72>
- Crosbie, S., Holm, A., & Dodd, B. (2005). Intervention for children with severe speech disorder: A comparison of two approaches. *International Journal of Language & Communication Disorders*, 40(4), 467 – 491. <http://www.informaworld.com/10.1080/13682820500126049>
- Crosbie, S., Pine, C., Holm, A., & Dodd, B. (2006). Treating Jarrod: A core vocabulary approach. *Advances in Speech-Language Pathology*, 8(3), 316–321. <https://doi.org/10.1080/14417040600750172>
- Culatta, B., Setzer, L. A., & Horn, D. (2005). Meaning-based intervention for a child with speech and language disorders. *Topics in Language Disorders*, 25(4), 388–401. [https://journals.lww.com/topicsinlanguagedisorders/Fulltext/2005/10000/Meaning\\_Based\\_Intervention\\_for\\_a\\_Child\\_With\\_Speech.13.aspx](https://journals.lww.com/topicsinlanguagedisorders/Fulltext/2005/10000/Meaning_Based_Intervention_for_a_Child_With_Speech.13.aspx)
- Cummings, A. E., & Barlow, J. A. (2011). A comparison of word lexicality in the treatment of speech sound disorders. *Clinical Linguistics & Phonetics*, 25(4), 265–286. <https://doi.org/10.3109/02699206.2010.528822>
- Cummings, A., Hallgrimson, J., & Robinson, S. (2019). Speech intervention outcomes associated with word lexicality and intervention intensity. *Language, Speech, and Hearing Services in Schools*, 50(1), 83–98. [https://doi.org/10.1044/2018\\_lshss-18-0026](https://doi.org/10.1044/2018_lshss-18-0026)
- Dean, E. C., Howell, J., Waters, D., & Reid, J. (1995). Metaphon: A metalinguistic approach to the treatment of phonological disorder in children. *Clinical Linguistics & Phonetics*, 9(1), 1–19. <https://doi.org/10.3109/02699209508985318>
- Denne, M., Langdown, N., Pring, T., & Roy, P. (2005). Treating children with expressive phonological disorders: Does phonological awareness therapy work in the clinic? *International Journal of Language & Communication Disorders*, 40(4), 493–504. <https://doi.org/10.1080/13682820500142582>

- Dinnsen, D. A., & Gierut, J. A. (2008). The predictive power of optimality theory for phonological treatment. *Asia Pacific Journal of Speech, Language and Hearing*, 11(4), 239–249. <https://doi.org/10.1179/136132808805335608>
- Dinnsen, D. A., Chin, S. B., & Elbert, M. (1992). On the lawfulness of change in phonetic inventories. *Lingua*, 86(2), 207–222. [https://doi.org/10.1016/0024-3841\(92\)90036-I](https://doi.org/10.1016/0024-3841(92)90036-I)
- Dodd, B., & Barker, R. (1990). The efficacy of utilizing parents and teachers as agents of therapy for children with phonological disorders. *Australia Journal of Human Communication Disorders*, 18, 29–44. <https://doi.org/10.3109/asl2.1990.18.issue-1.03>
- Dodd, B., & Bradford, A. (2000). A comparison of three therapy methods for children with different types of developmental phonological disorder. *International Journal of Language & Communication Disorders*, 35(2), 189–209. <https://doi.org/10.1080/136828200247142>
- Dodd, B., & Lacano, T. (1989). Phonological disorders in children: Changes in phonological process use during treatment. *British Journal of Disorders of Communication*, 24(3), 333–351. <https://doi.org/10.3109/13682828909019894>
- Dodd, B., Crosbie, S., McIntosh, B., Holm, A., Harvey, C., Liddy, M., Fontyne, K., Pinchin, B., & Rigby, H. (2008). The impact of selecting different contrasts in phonological therapy. *International Journal of Speech-Language Pathology*, 10(5), 334–345. <https://doi.org/10.1080/14417040701732590>
- Donicht, G., Pagliarin, K. C., Mota, H. B., & Keske-Soares, M. (2011). O tratamento com os róticos e a generalização obtida em dois modelos de terapia fonológica [The treatment with rothics and generalization obtained in two models of phonological therapy]. *Jornal da Sociedade Brasileira de Fonoaudiologia*, 23, 71–76. <https://doi.org/10.1590/S2179-64912011000100015>
- Dunn, C., & Barron, C. (1982). A treatment program for disordered phonology: Phonetic and linguistic considerations. *Language, Speech, and Hearing Services in Schools*, 13, 100–109. <https://doi.org/10.1044/0161-1461.1302.100>
- Eikeseth, S., & Nasset, R. (2003). Behavioral treatment of children with phonological disorder: The efficacy of vocal imitation and sufficient-response-exemplar training. *Journal of Applied Behavior Analysis*, 36, 325–337. <https://doi.org/10.1901/jaba.2003.36-325>
- Eiserman, W. D., McCoun, M., & Escobar, C. M. (1990). A cost-effectiveness analysis of two alternative program models for serving speech-disordered preschoolers. *Journal of Early Intervention*, 14(4), 297–317. <https://doi.org/10.1177/105381519001400402>
- Eiserman, W. D., Weber, C., & McCoun, M. (1992). Two alternative program models for serving speech-disordered preschoolers: A second year follow-up. *Journal of Communication Disorders*, 25(2–3), 77–106. [https://doi.org/10.1016/0021-9924\(92\)90001-D](https://doi.org/10.1016/0021-9924(92)90001-D)
- Elbert, M. (1993). Analysis and treatment from a phonologically orientated perspective. *Seminars in Speech and Language*, 14(2), 119–127.
- Elbert, M., & McReynolds, L. V. (1985). The generalization hypothesis: Final consonant deletion. *Language and Speech*, 28, 281–290. <https://doi.org/10.1177/002383098502800305>
- Elbert, M., Dinnsen, D. A., Swartzlander, P., & Chin, S. B. (1990). Generalization to conversational speech. *Journal of Speech and Hearing Disorders*, 55, 694–699. <https://doi.org/10.1044/jshd.5504.694>
- Elbert, M., Powell, T. W., & Swartzlander, P. (1991). Toward a technology of generalization: How many exemplars are sufficient? *Journal of Speech and Hearing Research*, 34, 81–87. <https://doi.org/10.1044/jshr.3401.81>
- Enderby, P., & John, A. (1997). *Therapy outcome measures (TOM) speech and language therapy*. Singular Publishing.
- Enderby, P., & John, A. (2015). *Therapy outcome measures for rehabilitation professionals (3rd edition)*. Guildford.
- Farquharson, K., Tambyraja, S. R., & Justice, L. M. (2020). Contributions to gain in speech sound production accuracy for children with speech sound disorders: Exploring child and therapy factors. *Language, Speech, and Hearing Services in Schools*, 51(2), 457–468. [https://doi.org/10.1044/2019\\_LSHSS-19-00079](https://doi.org/10.1044/2019_LSHSS-19-00079)
- Feehan, A., Francis, C., Bernhardt, B. M., & Colozzo, P. (2015). Phonological and morphosyntactic intervention for a twin pair. *Child Language Teaching and Therapy*, 31(1), 53–69. <https://doi.org/10.1177/0265659014536205>
- Fey, M. E., Cleave, P. L., Ravida, A. I., Long, S. H., Dejmaj, A. E., & Easton, D. L. (1994). Effects of grammar facilitation on the phonological performance of children with speech and language impairments. *Journal of Speech and Hearing Research*, 37(3), 594–607. <https://doi.org/10.1044/jshr.3703.594>
- Fey, M., & Stalker, C. H. (1986). A hypothesis-testing approach to treatment of a child with an idiosyncratic (morpho)phonological system. *Journal of Speech and Hearing Disorders*, 51, 309–324. <https://doi.org/10.1044/jshd.5104.324>
- Flanagan, K. J., & Ttofari Eecen, K. (2018). Core vocabulary therapy for the treatment of inconsistent phonological disorder: Variations in service delivery. *Child Language Teaching and Therapy*, 34(3), 209–219. <https://doi.org/10.1177/0265659018784702>

- Flint, C. B., & Costello Ingham, J. (2005). Pretreatment stimulability and percentage of consonants correct as predictors of across-phoneme generalization. *Contemporary Issues in Communication Sciences and Disorders*, 32, 53–63. [https://doi.org/10.1044/cicsd\\_32\\_S\\_53](https://doi.org/10.1044/cicsd_32_S_53)
- Forrest, K., & Elbert, M. (2001). Treatment for phonologically disordered children with variable substitution patterns. *Clinical Linguistics & Phonetics*, 15, 41–45. <https://doi.org/10.3109/02699200109167628>
- Forrest, K., & Iuzzini, J. (2008). A comparison of oral motor and production training for children with speech sound disorders. *Seminars in Speech and Language*, 29(4), 304–311. <https://doi.org/10.1055/s-0028-1103394>
- Forrest, K., Dinnsen, D. A., & Elbert, M. (1997). Impact of substitution patterns on phonological learning by misarticulating children. *Clinical Linguistics & Phonetics*, 11, 63–76. <https://doi.org/10.1080/02699209708985183>
- Forrest, K., Elbert, M., & Dinnsen, D. A. (2000). The effect of substitution patterns on phonological treatment outcomes. *Clinical Linguistics & Phonetics*, 14, 519–531. <https://doi.org/10.1080/026992000750020341>
- Geronikou, E., Vance, M., Wells, B., & Thomson, J. (2019). The case for morphophonological intervention: Evidence from a Greek-speaking child with speech difficulties. *Child Language Teaching and Therapy*, 35(1), 5–23. <https://doi.org/10.1177/0265659018810329>
- Gibbon, F., Shockey, L., & Reid, J. (1992). Description and treatment of abnormal vowels in a phonologically disordered child. *Child Language Teaching and Therapy*, 8(1), 30–59. <https://doi.org/10.1177/026565909200800103>
- Gierut, J. A. (1989). Maximal opposition approach to phonological treatment. *Journal of Speech and Hearing Disorders*, 54(1), 9–19. <https://doi.org/10.1044/jshd.5401.09>
- Gierut, J. A. (1990). Differential learning of phonological oppositions. *Journal of Speech and Hearing Research*, 33, 540–549. <https://doi.org/10.1044/jshr.3303.540>
- Gierut, J. A. (1991). Homonymy in phonological change. *Clinical Linguistics & Phonetics*, 5, 119–137. <https://doi.org/10.3109/02699209108985509>
- Gierut, J. A. (1992). The conditions and course of clinically induced phonological change. *Journal of Speech and Hearing Research*, 35, 1049–1063. <https://doi.org/10.1044/jshr.3505.1049>
- Gierut, J. A. (1994). Cyclicity in the acquisition of phonemic distinctions. *Lingua*, 94(1), 1–23. [https://doi.org/10.1016/0024-3841\(94\)90018-3](https://doi.org/10.1016/0024-3841(94)90018-3)
- Gierut, J. A. (1996). An experimental test of phonemic cyclicity. *Journal of Child Language*, 23, 81–102. <https://doi.org/10.1017/S0305000900010102>
- Gierut, J. A. (1998). Natural domains of cyclicity in phonological acquisition. *Clinical Linguistics & Phonetics*, 12(6), 481–499. <https://doi.org/10.3109/02699209808985239>
- Gierut, J. A. (1999). Syllable onsets: Clusters and adjuncts in acquisition. *Journal of Speech, Language, and Hearing Research*, 42, 708–726. <https://doi.org/10.1044/jslhr.4203.708>
- Gierut, J. A., & Champion, A. H. (1999). Interacting error patterns and their resistance to treatment. *Clinical Linguistics & Phonetics*, 13, 421–431. <https://doi.org/10.1080/026992099298960>
- Gierut, J. A., & Champion, A. H. (2000). Ingressive substitutions: Typical or atypical phonological pattern? *Clinical Linguistics & Phonetics*, 14, 603–617. <https://doi.org/10.1080/026992000750048134>
- Gierut, J. A., & Champion, A. H. (2001). Syllable onsets II: Three-element clusters in phonological treatment. *Journal of Speech, Language, and Hearing Research*, 44, 886–904. [https://doi.org/10.1044/1092-4388\(2001/071\)](https://doi.org/10.1044/1092-4388(2001/071))
- Gierut, J. A., & Dinnsen, D. A. (1987). On predicting ease of phonological learning. *Applied Linguistics*, 8(3), 241–263. <https://doi.org/10.1093/applin/8.3.241>
- Gierut, J. A., & Morrisette, M. L. (1996). Triggering a principle of phonemic acquisition. *Clinical Linguistics & Phonetics*, 10(1), 15–30.
- Gierut, J. A., & Morrisette, M. L. (2010). Phonological learning and lexicality of treated stimuli. *Clinical Linguistics & Phonetics*, 24(2), 122–140. <https://doi.org/10.3109/02699200903440975>
- Gierut, J. A., & Morrisette, M. L. (2012a). Age of word acquisition effects in treatment of children with phonological delays. *Applied Psycholinguistics*, 33(01), 121–144. <https://doi.org/10.1017/S0142716411000294>
- Gierut, J. A., & Morrisette, M. L. (2012b). Density, frequency and the expressive phonology of children with phonological delay. *Journal of Child Language*, 39(04), 804–834. <https://doi.org/10.1017/S0305000911000304>
- Gierut, J. A., & Morrisette, M. L. (2014). How to meet the neighbors: Modality effects on phonological generalization. *Clinical Linguistics & Phonetics*, 28, 477–492. <https://doi.org/10.3109/02699206.2014.926992>



- Gierut, J. A., & Morrisette, M. L. (2015). Dense neighborhoods and mechanisms of learning: evidence from children with phonological delay. *Journal of Child Language*, 42(5), 1036–1072. <https://doi.org/10.1017/S0305000914000701>
- Gierut, J. A., Elbert, M., & Dinnsen, D. A. (1987). A functional analysis of phonological knowledge and generalization learning in misarticulating children. *Journal of Speech and Hearing Research*, 30, 462–479. <https://doi.org/10.1044/jshr.3004.432>
- Gierut, J. A., Morrisette, M. L., & Champion, A. H. (1999). Lexical constraints in phonological acquisition. *Journal of Child Language*, 26, 261–294. <https://doi.org/10.1017/S0305000999003797>
- Gierut, J. A., Morrisette, M. L., & Dickinson, S. L. (2015). Effect size for single-subject design in phonological treatment. *Journal of Speech, Language, and Hearing Research*, 58(5), 1464–1481. [https://doi.org/10.1044/2015\\_JSLHR-S-14-0299](https://doi.org/10.1044/2015_JSLHR-S-14-0299)
- Gierut, J. A., Morrisette, M. L., & Ziemer, S. M. (2010). Nonwords and generalization in children with phonological disorders. *American Journal of Speech-Language Pathology*, 19(2), 167–177. [https://doi.org/10.1044/1058-0360\(2009/09-0020\)](https://doi.org/10.1044/1058-0360(2009/09-0020))
- Gierut, J. A., Morrisette, M. L., Hughes, M. T., & Rowland, S. (1996). Phonological Treatment Efficacy and Developmental Norms. *Language, Speech, and Hearing Services in Schools*, 27(3), 215–230. <https://doi.org/10.1044/0161-1461.2703.215>
- Gildersleeve-Neumann, C., & Goldstein, B. A. (2015). Cross-linguistic generalization in the treatment of two sequential Spanish-English bilingual children with speech sound disorders. *International Journal of Speech-Language Pathology*, 17, 26–40. <https://doi.org/10.3109/17549507.2014.898093>
- Gillon, G. (2000). The efficacy of phonological awareness intervention for children with spoken language impairments. *Language, Speech, and Hearing Services in Schools*, 31, 26–41. <https://doi.org/10.1044/0161-1461.3102.126>
- Gillon, G. (2005). Facilitating phoneme awareness development in 3- and 4-year-old children with speech impairment. *Language, Speech, and Hearing Services in Schools*, 36(4), 308–324. [https://doi.org/10.1044/0161-1461\(2005/031\)](https://doi.org/10.1044/0161-1461(2005/031))
- Girolametto, L., Pearce, P. S., & Weitzman, E. (1997). Effects of lexical intervention on the phonology of late talkers. *Journal of Speech, Language, and Hearing Research*, 40, 338–348. <https://doi.org/10.1044/jslhr.4002.338>
- Glaspey, A., & Macleod, A. A. (2010). A multi-dimensional approach to gradient change in phonological acquisition: A case study of disordered speech development. *Clinical Linguistics & Phonetics*, 24, 283–99. <https://doi.org/10.3109/02699200903581091>
- Glaspey, A. M., & Stoel-Gammon, C. (2005). Dynamic assessment in phonological disorders: The Scaffolding Scale of Stimulability. *Topics in Language Disorders*, 25(3). [https://journals.lww.com/topicsinlanguagedisorders/Fulltext/2005/07000/Dynamic\\_Assessment\\_in\\_Phonological\\_Disorders\\_The.5.aspx](https://journals.lww.com/topicsinlanguagedisorders/Fulltext/2005/07000/Dynamic_Assessment_in_Phonological_Disorders_The.5.aspx)
- Glaspey, A., & Stoel-Gammon, C. (2007). A dynamic approach to phonological assessment. *International Journal of Speech-Language Pathology*, 9, 286–296. <https://doi.org/10.1080/14417040701435418>
- Glogowska, M., Roulstone, S., Enderby, P., & Peters, T. J. (2000). Randomized controlled trial of community-based speech and language therapy in preschool children. *British Medical Journal*, 321, 923. <https://doi.org/10.1136/bmj.321.7266.923>
- Goldstein, B. A. (1996). The role of stimulability in the assessment and treatment of Spanish-speaking children. *Journal of Communication Disorders*, 29, 299–314. [https://doi.org/10.1016/0021-9924\(96\)00014-7](https://doi.org/10.1016/0021-9924(96)00014-7)
- Grawburg, M., & Rvachew, S. (2007). Phonological awareness intervention for children with speech sound disorders. *Canadian Journal of Speech-Language Pathology and Audiology*, 31, 19–26.
- Grunwell, P., & Russell, J. (1990). A phonological disorder in an English-speaking child: A case study. *Clinical Linguistics & Phonetics*, 4(1), 29–38. <https://doi.org/10.3109/02699209008985468>
- Grunwell, P., Yavas, M., Russell, J., & Le Maistre, H. (1988). Developing a phonological system: A case study. *Child Language Teaching and Therapy*, 4(2), 142–153. <https://doi.org/10.1177/026565908800400202>
- Harbers, H. M., Paden, E. P., & Halle, J. W. (1999). Phonological awareness and production: Changes during intervention. *Language, Speech, and Hearing Services in Schools*, 30, 50–60. <https://doi.org/10.1044/0161-1461.3001.50>
- Hart, S., & Gonzalez, L. (2010). The effectiveness of using communication-centered intervention to facilitate phonological learning in young children. *Communication Disorders Quarterly*, 32, 13–25. <https://doi.org/10.1177/1525740109333966>

- Hesketh, A., Adams, C., Nightingale, C., & Hall, R. (2000). Phonological awareness therapy and articulatory training approaches for children with phonological disorders: A comparative outcome study. *International Journal of Language & Communication Disorders*, 35, 337–354. <https://doi.org/10.1080/136828200410618>
- Hesketh, A., Dima, E., & Nelson, V. (2007). Teaching phoneme awareness to pre-literate children with speech disorder: A randomized controlled trial. *International Journal of Language & Communication Disorders*, 42(3), 251–271. <https://doi.org/10.1080/13682820600940141>
- Hodson, B. W. (1983). A facilitative approach for remediation of a child's profoundly unintelligible phonological system. *Topics in Language Disorders*, 3(2). [https://journals.lww.com/topicsinlanguagedisorders/Fulltext/1983/03000/A\\_facilitative\\_approach\\_for\\_remediation\\_of\\_a.6.aspx](https://journals.lww.com/topicsinlanguagedisorders/Fulltext/1983/03000/A_facilitative_approach_for_remediation_of_a.6.aspx)
- Hodson, B. W., Nonomura, C. W., & Zappia, M. J. (1989). Phonological disorders: Impact on academic performance? *Seminars in Speech and Language*, 10(3), 252–259. <https://doi.org/10.1055/s-2008-1064267>
- Hoffman, P. R., Norris, J. A., & Monjure, J. (1990). Comparison of process targeting and whole language treatments for phonologically delayed preschool children. *Language, Speech, and Hearing Services in Schools*, 21, 102–109. <https://doi.org/10.1044/0161-1461.2102.102>
- Hoffman, P. R., Norris, J. A., & Monjure, J. (1996). Effects of narrative intervention on a pre-schooler's syntactic and phonological development. *National Student Speech Language Hearing Association Journal*, 23, 5–13. [https://doi.org/10.1044/nsshla\\_23\\_5](https://doi.org/10.1044/nsshla_23_5)
- Hoffmann, T. C., Glasziou, P. P., Boutron, I., Milne, R., Perera, R., Moher, D., Altman, D. G., Barbour, V., Macdonald, H., Johnston, M., Lamb, S. E., Dixon-Woods, M., McCulloch, P., Wyatt, J. C., Chan, A. W., & Michie, S. (2014). Better reporting of interventions: Template for intervention description and replication (TIDieR) checklist and guide. *BMJ*, 348, g1687. <https://doi.org/10.1136/bmj.g1687>
- Holm, A., & Dodd, B. (1999). An intervention case study of a bilingual child with phonological disorder. *Child Language Teaching and Therapy*, 15, 139–158. <https://doi.org/10.1177/026565909901500203>
- Holm, A., & Dodd, B. (2001). Comparison of cross-language generalisation following speech therapy. *Folia Phoniatrica et Logopaedica*, 53, 166–172. <https://doi.org/10.1159/000052671>
- Holm, A., Dodd, B., & Ozanne, A. (1997). Efficacy of intervention for a bilingual child making articulation and phonological errors. *The International Journal of Bilingualism*, 1, 55–69. <https://doi.org/10.1177/136700699700100105>
- Jarvis, J. (1989). Taking a Metaphon approach to phonological development: A case study. *Child Language Teaching and Therapy*, 5(1), 16–32. <https://doi.org/10.1177/026565908900500102>
- Jesus, L. M. T., Martinez, J., Santos, J., Hall, A., & Joffe, V. (2019). Comparing traditional and tablet-based intervention for children with speech sound disorders: a randomized controlled trial. *Journal of Speech, Language, and Hearing Research*, 62(11), 4045–4061. [https://doi.org/10.1044/2019\\_JSLHR-S-18-0301](https://doi.org/10.1044/2019_JSLHR-S-18-0301)
- Keske-Soares, M., Brancalioni, A. R., Marini, C., Pagliarin, K. C., & Ceron, M. I. (2008). Eficácia da terapia para desvios fonológicos com diferentes modelos terapêuticos [Therapy effectiveness for phonological disorders with different therapeutic approaches]. *Pró-Fono Revista de Atualização Científica*, 20, 153–9. <https://doi.org/10.1590/S0104-56872008000300003>
- Grunwell, P., Yavas, M., Russell, J., & Le Maistre, H. (1988). Developing a phonological system: a case study. *Child Language Teaching and Therapy*, 4(2), 142–153. <https://doi.org/10.1177/026565908800400202>
- Kwiatkowski, J., & Shriberg, L. D. (1993). Speech normalization in developmental phonological disorders: A retrospective study of capability-focus theory. *Language, Speech, and Hearing Services in Schools*, 24(1), 10–18. <https://doi.org/10.1044/0161-1461.2401.10>
- Lancaster, G., Keusch, S., Levin, A., Pring, T., & Martin, S. (2010). Treating children with phonological problems: Does an eclectic approach to therapy work? *International Journal of Language & Communication Disorders*, 45(2), 174–181. <https://doi.org/10.3109/13682820902818888>
- Leahy, J., & Dodd, B. (1987). The development of disordered phonology: A case study. *Language and Cognitive Processes*, 2, 115–132. <https://doi.org/10.1080/01690968708406353>
- Lee, S. A. S. (2018). The treatment efficacy of multiple opposition phonological approach via telepractice for two children with severe phonological disorders in rural areas of West Texas in the USA. *Child Language Teaching and Therapy*, 34(1), 63–78. <https://doi.org/10.1177/0265659018755527>
- Leite, R. A., Wertzner, H. F., & Matas, C. G. (2010). Long latency auditory evoked potentials in children with phonological disorder. *Pró-Fono Revista de Atualização Científica*, 22(4), 561–566. <https://doi.org/10.1590/S0104-56872010000400034>

- Leite, R. A., Wertzner, H. F., Goncalves, I. C., Magliaro, F. C., & Matas, C. G. (2014). Auditory evoked potentials: Predicting speech therapy outcomes in children with phonological disorders. *Clinics*, 69, 212–218. [https://doi.org/10.6061/clinics/2014\(03\)12](https://doi.org/10.6061/clinics/2014(03)12)
- Lousada, M., Jesus, L. M., Capelas, S., Margaça, C., Simões, D., Valente, A., Hall, A., & Joffe, V. L. (2013). Phonological and articulation treatment approaches in Portuguese children with speech and language impairments: a randomized controlled intervention study. *International Journal of Language & Communication Disorders*, 48(2), 172–187. <https://doi.org/10.1111/j.1460-6984.2012.00191.x>
- Lousada, M., Jesus, L. M. T., Hall, A., & Joffe, V. (2014). Intelligibility as a clinical outcome measure following intervention with children with phonologically based speech-sound disorders. *International Journal of Language & Communication Disorders*, 49, 584–601. <https://doi.org/10.1111/1460-6984.12095>
- Loyd, B., Abidin, R., & Loyd, B. (1985). Revision of the Parenting Stress Index. *Journal of Pediatric Psychology*, 10(2), 169–177. <https://doi.org/10.1093/jpepsy/10.2.169>
- Lundeborg, I., Nordin, E., Zeipel-Stjerna, M., & McAllister, A. (2015). Voice onset time in Swedish children with phonological impairment. *Logopedics Phoniatrics Vocology*, 40(4), 149–155. <https://doi.org/10.3109/14015439.2014.934276>
- MacLeod, A. A., & Glaspey, A. M. (2014). A multidimensional view of gradient change in velar acquisition in three-year-olds receiving phonological treatment. *Clinical Linguistics & Phonetics*, 28(9), 664–681. <https://doi.org/10.3109/02699206.2013.878855>
- Major, E. M., & Bernhardt, B. (1998). Metaphonological skills of children with phonological disorders before and after phonological and metaphonological intervention. *International Journal of Language & Communication Disorders*, 33, 413–444. <https://doi.org/10.1080/136828298247712>
- Masterson, J. J., & Daniels, D. L. (1991). Motoric versus contrastive approaches to phonology therapy: A case study. *Child Language Teaching and Therapy*, 7, 127–140. <https://doi.org/10.1177/026565909100700202>
- Mcintosh, B., & Dodd, B. (2008). Evaluation of core vocabulary intervention for treatment of inconsistent phonological disorder: Three treatment case studies. *Child Language Teaching and Therapy*, 24, 307–327. <https://doi.org/10.1177/0265659007096295>
- McKean, K., Phillips, B., & Thompson, A. (2012). A family-centred model of care in paediatric speech-language pathology. *International Journal of Speech Language Pathology*, 14(3), 235–246. <https://doi.org/10.3109/17549507.2011.604792>
- McLeod, S. (2004). Speech pathologists' application of the ICF to children with speech impairment. *Advances in Speech-Language Pathology*, 6(1), 75–81. <https://doi.org/10.1080/14417040410001669516>
- McLeod, S., & Isaac, K. (1995). Use of spectrographic analyses to evaluate the efficacy of phonological intervention. *Clinical Linguistics & Phonetics*, 9(3), 229–234. <https://doi.org/10.3109/02699209508985334>
- McLeod, S., Baker, E., McCormack, J., Wren, Y., Roulstone, S., Crowe, K., Masso, S., White, P., & Howland, C. (2017). Cluster-randomized controlled trial evaluating the effectiveness of computer-assisted intervention delivered by educators for children with speech sound disorders. *Journal of Speech, Language, and Hearing Research*, 60(7), 1891–1910. [https://doi.org/10.1044/2017\\_JSLHR-S-16-0385](https://doi.org/10.1044/2017_JSLHR-S-16-0385)
- McLeod, S., Davis, E., Rohr, K., McGill, N., Miller, K., Roberts, A., Thornton, S., Ahio, N., & Ivory, N. (2020). Waiting for speech-language pathology services: A randomised controlled trial comparing therapy, advice and device. *International Journal of Speech-Language Pathology*, 22(3), 372–386. <https://doi.org/10.1080/17549507.2020.1731600>
- Mecrow, C., Beckwith, J., & Klee, T. (2010). An exploratory trial of the effectiveness of an enhanced consultative approach to delivering speech and language intervention in schools. *International Journal of Language & Communication Disorders*, 45(3), 354–367. <https://doi.org/10.3109/13682820903040268>
- Miccio, A. W., & Elbert, M. (1996). Enhancing stimulability: A treatment program. *Journal of Communication Disorders*, 29(4), 335–351. [https://doi.org/10.1016/0021-9924\(96\)00016-0](https://doi.org/10.1016/0021-9924(96)00016-0)
- Miccio, A., & Ingrisano, D. (2000). The acquisition of fricatives and affricates: Evidence from a disordered phonological system. *American Journal of Speech-Language Pathology*, 9(3), 214–229. <https://doi.org/10.1044/1058-0360.0903.214>
- Miccio, A. W., Elbert, M., & Forrest, K. (1999). The relationship between stimulability and phonological acquisition in children with normally developing and disordered phonologies. *American Journal of Speech-Language Pathology*, 8(4), 347–363. <https://doi.org/10.1044/1058-0360.0804.347>
- Monahan, D. (1986). Remediation of common phonological processes: Four case studies. *Language, Speech, and Hearing Services in Schools*, 17(3), 199–206. <https://doi.org/10.1044/0161-1461.1703.199>

- Montgomery, J. K., & Bonderman, R. I. (1989). Serving preschool children with severe phonological disorders. *Language, Speech, and Hearing Services in Schools*, 20(1), 76–84. <https://doi.org/10.1044/0161-1461.2001.76>
- Morrisette, M. L., & Gierut, J. A. (2002). Lexical organization and phonological change in treatment. *Journal of Speech, Language, and Hearing Research*, 45(1), 143–159. [https://doi.org/10.1044/1092-4388\(2002/011\)](https://doi.org/10.1044/1092-4388(2002/011))
- Mota, H. B., Begetti, T., Keske-Sozres, M., & Pereira, L. F. (2005). Generalization based on implicational relationships in subjects treated with phonological therapy. *Pro-Fono Revista de Atualizacao Cientifica, Barucri (SP)*, 17(1), 99–110.
- Mota, H. B., Keske-Soares, M., Bagetti, T., Ceron, M. I., & Filha, M. (2007). Análise comparativa da eficiência de três diferentes modelos de terapia fonológica [Comparative analyses of the effectiveness of three different phonological therapy models]. *Pró-Fono Revista de Atualização Científica*, 19, 67–74. <https://doi.org/10.1590/S0104-56872007000100008>
- Murphy, C. F. B., Pagan-Neves, L. O., Wertzner, H. F., & Schochat, E. (2015). Children with speech sound disorder: Comparing a non-linguistic auditory approach with a phonological intervention approach to improve phonological skills. *Frontiers in Psychology*, 6. <https://doi.org/10.3389/fpsyg.2015.00064>
- Olswang, L. B., & Bain, B. A. (1985). Monitoring phoneme acquisition for making treatment withdrawal decisions. *Applied Psycholinguistics*, 6, 17–37. <https://doi.org/10.1017/S0142716400005993>
- Ottow-Henning, E., & Keij, B. (2020). Does group intervention make a difference for the speech sound development of Dutch pre-school children with developmental language disorder? *International Journal of Speech-Language Pathology*, 22(6), 696–707. <https://doi.org/10.1080/17549507.2020.1842496>
- Olson, D. H., Portner, J., & Lavee, Y. (1985). *"Faces III": Family Adaptability & Cohesion Evaluation Scales, Family Social Science*. University of Minnesota.
- Page, F., Pertile, J.-A., Torresi, K., & Hudson, C. (1994). Alternative service delivery options: The effectiveness of intensive group treatment with pre-school children. *Australian Journal of Human Communication Disorders*, 22, 61–72. <https://doi.org/10.3109/asl2.1994.22.issue-2.06>
- Pagliarin, K. C., Mota, H. B., & Keske-Soares, M. (2009). Therapeutic efficacy analysis of three contrastive approach phonological models. *Pró-Fono Revista de Atualização Científica*, 21(4), 297–302.
- Pagliarin, K. C., Mota, H. B., & Keske-Soares, M. (2011). Generalização estrutural a partir do tratamento por diferentes modelos de oposições [Structural generalization after treatment based on different oppositions approaches]. *Revista da Sociedade Brasileira de Fonoaudiologia*, 16, 356–361. <https://doi.org/10.1590/S1516-80342011000300019>
- Pagliarin, K. C., Brancalioni, A. R., & Keske-Soares, M. T. (2012). Phonological therapy based on the stimulation of single sounds and groups of sounds [fonológica a partir da estimulação de sons isolados e em conjunto]. *Revista da Sociedade Brasileira de Fonoaudiologia*, 17(1), 23–27. <https://doi.org/10.1590/S1516-80342012000100006>
- Palle, N., Berntsson, A., Miniscalco, C., & Persson, C. (2014). The effectiveness of phonological intervention in preschool children: A single-subject design study. *Logopedics, Phoniatrics, Vocology*, 39, 19–29. <https://doi.org/10.3109/14015439.2012.742561>
- Pascoe, M., Stackhouse, J., & Wells, B. (2005). Phonological therapy within a psycholinguistic framework: Promoting change in a child with persisting speech difficulties. *International Journal of Language & Communication Disorders*, 40, 189–220. <https://doi.org/10.1080/13682820412331290979>
- Pascoe, M., Rossouw, K., & Mahura, O. (2018). Core vocabulary intervention for an isiXhosa-English speaking child with speech sound difficulties. *Southern African Linguistics and Applied Language Studies*, 36(4), 313–328. <https://doi.org/10.2989/16073614.2018.1548292>
- Penney, G., Fee, J., & Dowdle, C. (1994). Vowel assessment and remediation: A case study. *Child Language Teaching and Therapy*, 10, 47–66. <https://doi.org/10.1177/026565909401000103>
- Perry, A., Morris, M., Unsworth, C., Duckett, S., Skeat, J., Dodd, K., Taylor, N., & Reilly, K. (2004). Therapy outcome measures for allied health practitioners in Australia: The AusTOMs. *International Journal for Quality in Health Care*, 16(4), 285–291. <https://doi.org/10.1093/intqhc/mzh059>
- Petinou, K., & Theodorou, E. (2019). Promoting speech intelligibility through phonologically dense targets. *Clinical Linguistics & Phonetics*, 33(10–11), 978–990. <https://doi.org/10.1080/02699206.2019.1597168>
- Pieretti, R. A., Kaul, S. D., Zarchy, R. M., & O'Hanlon, L. M. (2015). Using a multimodal approach to facilitate articulation, phonemic awareness, and literacy in young children. *Communication Disorders Quarterly*, 36, 131–141. <https://doi.org/10.1177/1525740114545360>

- Pollock, K. E. (1983). Individual preferences: Case study of a phonologically delayed child. *Topics in Language Disorders*, 3(2). [https://journals.lww.com/topicsinlanguagedisorders/Fulltext/1983/03000/Individual\\_preferences\\_\\_case\\_study\\_of\\_a.5.aspx](https://journals.lww.com/topicsinlanguagedisorders/Fulltext/1983/03000/Individual_preferences__case_study_of_a.5.aspx)
- Powell, T. W. (1993). Phonetic inventory constraints in young children: Factors affecting acquisition patterns during treatment. *Clinical Linguistics & Phonetics*, 7, 45–57. <https://doi.org/10.3109/02699209308985543>
- Powell, T. W. (1991). Planning for phonological generalization: An approach to treatment target selection. *American Journal of Speech-Language Pathology*, 1(1), 21–27. <https://doi.org/10.1044/1058-0360.0101.21>
- Powell, T. W., & Elbert, M. (1984). Generalization following the remediation of early- and later- developing consonant clusters. *Journal of Speech and Hearing Disorders*, 49, 211–218. <https://doi.org/10.1044/jshd.4902.218>
- Powell, T. W., Elbert, M., & Dinnsen, D. A. (1991). Stimulability as a factor in the phonological generalization of misarticulating preschool children. *Journal of Speech and Hearing Research*, 34, 1318–1328. <https://doi.org/10.1044/jshr.3406.1318>
- Powell, T. W., Elbert, M., Miccio, A. W., Strike-Roussos, C., & Brasseur, J. (1998). Facilitating [s] production in young children: An experimental evaluation of motoric and conceptual treatment approaches. *Clinical Linguistics & Phonetics*, 12, 127–146. <https://doi.org/10.3109/02699209808985217>
- Powell, T. W., Miccio, A. W., Elbert, M., Brasseur, J. A., & Strike-Roussos, C. (1999). Patterns of sound change in children with phonological disorders. *Clinical linguistics & phonetics*, 13(3), 163–182. <https://doi.org/10.1080/026992099299121>
- Qiu, W.H., Dou, Z. L., Wan, G.-F., Hu, X. Q., Li, J. Y., & Chen, X. M. (2004). Clinical manifestations of the functional phonological disorders and curative effect of the phonological treatment. *Chinese Journal of Clinical Rehabilitation*, 8(34), 7816–7818.
- Ray, J. (2002). Treating phonological disorders in a multilingual child: A case study. *American Journal of Speech-Language Pathology*, 11, 305–315. [https://doi.org/10.1044/1058-0360\(2002/035\)](https://doi.org/10.1044/1058-0360(2002/035))
- Robb, M. P., Bleile, K. M., & Yee, S. S. L. (1999). A phonetic analysis of vowel errors during the course of treatment. *Clinical Linguistics & Phonetics*, 13, 309–321. <https://doi.org/10.1080/026992099299103>
- Rossouw, K., & Pascoe, M. (2018). Intervention for bilingual speech sound disorders: A case study of an isiXhosa–English-speaking child. *South African Journal of Communication Disorders*, 65(1), a566. <https://doi.org/10.4102/sajcd.v65i1.566>
- Rudolph, J. M., & Wendt, O. (2014). The efficacy of the cycles approach: A multiple baseline design. *Journal of Communication Disorders*, 47, 1–16. <https://doi.org/10.1016/j.jcomdis.2013.12.003>
- Ruscello, D. M. (1995). Speech appliances in the treatment of phonological disorders. *Journal of Communication Disorders*, 28(4), 331–353. [https://doi.org/10.1016/0021-9924\(95\)00060-8](https://doi.org/10.1016/0021-9924(95)00060-8)
- Ruscello, D., Cartwright, L., Haines, K., & Shuster, L. (1993). The use of different service delivery models for children with phonological disorders. *Journal of Communication Disorders*, 26(3), 193–203. [https://doi.org/10.1016/0021-9924\(93\)90008-X](https://doi.org/10.1016/0021-9924(93)90008-X)
- Rvachew, S. (1994). Speech perception training can facilitate sound production learning. *Journal of Speech and Hearing Research*, 37, 347–357. <https://doi.org/10.1044/jshr.3702.347>
- Rvachew, S., & Bernhardt, B. M. (2010). Clinical implications of dynamic systems theory for phonological development. *American Journal of Speech-Language Pathology*, 19(1), 34–50. [https://doi.org/10.1044/1058-0360\(2009/08-0047\)](https://doi.org/10.1044/1058-0360(2009/08-0047))
- Rvachew, S., & Brosseau-Lapr  , F. (2015). A randomized trial of 12-week interventions for the treatment of developmental phonological disorder in Francophone children. *American Journal of Speech-Language Pathology*, 24(4), 637–658. [https://doi.org/10.1044/2015\\_ajslp-14-0056](https://doi.org/10.1044/2015_ajslp-14-0056)
- Rvachew, S., & Nowak, M. (2001). The effect of target-selection strategy on phonological learning. *Journal of Speech, Language, and Hearing Research*, 44(3), 610–623. [https://doi.org/10.1044/1092-4388\(2001/050\)](https://doi.org/10.1044/1092-4388(2001/050))
- Rvachew, S., Nowak, M., & Cloutier, G. (2004). Effect of phonemic perception training on the speech production and phonological awareness skills of children with expressive phonological delay. *American Journal of Speech-Language Pathology*, 13, 250–263. [https://doi.org/10.1044/1058-0360\(2004/026\)](https://doi.org/10.1044/1058-0360(2004/026))
- Rvachew, S., Rafaat, S., & Martin, M. (1999). Stimulability, speech perception skills, and the treatment of phonological disorders. *American Journal of Speech-Language Pathology*, 8, 33–43. <https://doi.org/10.1044/1058-0360.0801.33>

- Saben, C. B., & Costello Ingham, J. (1991). The effects of minimal pairs treatment on the speech-sound production of two children with phonologic disorders. *Journal of Speech and Hearing Research*, 14, 1023–1040. <https://doi.org/10.1044/jshr.3405.1023>
- Seef-Gabriel, B., Chiat, S., & Pring, T. (2012). Intervention for co-occurring speech and language difficulties: Addressing the relationship between the two domains. *Child Language Teaching and Therapy*, 28, 123–135. <https://doi.org/10.1177/0265659011432498>
- Shea, R. L., & Tyler, A. A. (2001). The effectiveness of a prosodic intervention on children's metrical patterns. *Child Language Teaching and Therapy*, 17, 55–76. <https://doi.org/10.1191/026565901668193508>
- Shiller, D. M., Rvachew, S., & Brosseau-Lapr  , F. (2010). Importance of the auditory perceptual target to the achievement of speech production accuracy. *Canadian Journal of Speech-Language Pathology and Audiology*, 34.
- Shoaf, K. O., Iyer, S. N., & Bothe, A. K. (2009). Using a single-subject experimental design to implement a nonlinear phonology approach to target selection. *Contemporary Issues in Communication Sciences and Disorders*, 36, 77–88. [https://doi.org/10.1044/cicsd\\_36\\_S\\_77](https://doi.org/10.1044/cicsd_36_S_77)
- Shriberg, L. D., & Kwiatkowski, J. (1982). Phonological disorders II: A conceptual framework for management. *Journal of Speech and Hearing Disorders*, 47, 242–56. <https://doi.org/10.1044/jshd.4703.242>
- Shriberg, L. D., & Kwiatkowski, J. (1987). A retrospective study of spontaneous generalization in speech-delayed children. *Language, Speech, and Hearing Services in Schools*, 18, 144–157. <https://doi.org/10.1044/0161-1461.1802.144>
- Shriberg, L. D., & Kwiatkowski, J. (1990). Self-monitoring and generalization in preschool speech-delayed children. *Language, Speech, and Hearing Services in Schools*, 21, 157–170.
- Shriberg, L. D., Kwiatkowski, J., & Snyder, T. (1989). Tabletop versus microcomputer-assisted speech management: Stabilization phase. *Journal of Speech and Hearing Disorders*, 54, 233–248. <https://doi.org/10.1044/jshd.5402.233>
- Shriberg, L. D., Kwiatkowski, J., & Snyder, T. (1990). Tabletop versus microcomputer assisted speech management: Response evocation phase. *Journal of Speech and Hearing Disorders*, 55, 635–655. <https://doi.org/10.1044/jshd.5504.635>
- Shoaf, K. O., Iyer, S. N., & Bothe, A. K. (2009). Using a single-subject experimental design to implement a nonlinear phonology approach to target selection. *Contemporary Issues in Communication Science and Disorders*, 36(Spring), 77–88. [https://doi.org/10.1044/cicsd\\_36\\_S\\_77](https://doi.org/10.1044/cicsd_36_S_77)
- Smit, A. B., Brumbaugh, K. M., Weltsch, B., & Hilgers, M. (2018). Treatment of phonological disorder: a feasibility study with focus on outcome measures. *American Journal of Speech-Language Pathology*, 27(2), 536–552. [https://doi.org/10.1044/2017\\_AJSLP-16-0225](https://doi.org/10.1044/2017_AJSLP-16-0225)
- Smith, J., Downs, M., & Mogford-Bevan, K. (1998). Can phonological awareness training facilitate minimal pair therapy? *International Journal of Language & Communication Disorders*, 33(S1), 463–468. <https://doi.org/10.3109/13682829809179469>
- Speake, J., Stackhouse, J., & Pascoe, M. (2012). Vowel targeted intervention for children with persisting speech difficulties: Impact on intelligibility. *Child Language Teaching and Therapy*, 28, 277–295. <https://doi.org/10.1177/0265659012453463>
- Stoel-Gammon, C., Stone-Goldman, J., & Glaspey, A. (2002). Pattern-based approaches to phonological therapy. *Seminars in Speech and Language*, 23, 3–14. <https://doi.org/10.1055/s-2002-23507>
- Stringfellow, K., & Mcleod, S. (1994). Using a facilitating phonetic context to reduce an unusual form of gliding. *Language, Speech, and Hearing Services in Schools*, 25, 191–193. <https://doi.org/10.1044/0161-1461.2503.191>
- Sugden, E., Baker, E., Munro, N., & Williams, A. L. (2016). Involvement of parents in intervention for childhood speech sound disorders: a review of the evidence. *International Journal of Language & Communication Disorders*, 51(6), 597–625. <https://doi.org/10.1111/1460-6984.12247>
- Sugden, E., Baker, E., Williams, A. L., Munro, N., & Trivette, C. M. (2020). Evaluation of parent- and speech-language pathologist's delivered multiple oppositions intervention for children with phonological impairment: A multiple-baseline design study. *American Journal of Speech-Language Pathology*, 29(1), 111–126. [https://doi.org/10.1044/2019\\_AJSLP-18-0248](https://doi.org/10.1044/2019_AJSLP-18-0248)
- Thomas-Stonell, N. L., Oddson, B., Robertson, B., & Rosenbaum, P. L. (2010). Development of the FOCUS (Focus on the Outcomes of Communication Under Six), a communication outcome measure for preschool children. *Developmental Medicine and Child Neurology*, 52(1), 47–53. <https://doi.org/10.1111/j.1469-8749.2009.03410.x>
- Topbař, S., &  nal,  . (2010). An alternating treatment comparison of minimal and maximal opposition sound selection in Turkish phonological disorders. *Clinical Linguistics & Phonetics*, 24(8), 646–668. <https://doi.org/10.3109/02699206.2010.486464>



- Tyler, A. A. (2002). Language-based intervention for phonological disorders. *Seminars in Speech and Language*, 23(1), 69–82. <https://doi.org/10.1055/s-2002-23511>
- Tyler, A. A. (1995). Durational analysis of stridency errors in children with phonological impairment. *Clinical Linguistics & Phonetics*, 9, 211–228. <https://doi.org/10.3109/02699209508985333>
- Tyler, A. A., & Figurski, G. R. (1994). Phonetic inventory changes after treating distinctions along an implicational hierarchy. *Clinical Linguistics & Phonetics*, 8, 91–107. <https://doi.org/10.3109/02699209408985299>
- Tyler, A. A., & Lewis, K. E. (2005). Relationships among consistency/variability and other phonological measures over time. *Topics in Language Disorders*, 25, 243–253. <https://doi.org/10.1097/00011363-200507000-00007>
- Tyler, A. A., & Sandoval, K. T. (1994). Preschoolers with phonological and language disorders: Treating different linguistic domains. *Language, Speech, and Hearing Services in Schools*, 25, 215–234. <https://doi.org/10.1044/0161-1461.2504.215>
- Tyler, A. A., & Watterson, K. H. (1991). Effects of phonological versus language intervention in preschoolers with both phonological and language impairment. *Child Language Teaching and Therapy*, 7, 141–160. <https://doi.org/10.1177/026565909100700203>
- Tyler, A. A., Edwards, M. L., & Saxman, J. H. (1987). Clinical application of two phonologically based treatment procedures. *Journal of Speech and Hearing Disorders*, 52, 393–409. <https://doi.org/10.1044/jshd.5204.393>
- Tyler, A. A., Edwards, M. L., & Saxman, J. H. (1990). Acoustic validation of phonological knowledge and its relationship to treatment. *Journal of Speech and Hearing Disorders*, 55, 251–261. <https://doi.org/10.1044/jshd.5502.251>
- Tyler, A. A., Figurski, G. R., & Langsdale, T. (1993). Relationships between acoustically determined knowledge of stop place and voicing contrasts and phonological treatment progress. *Journal of Speech and Hearing Research*, 36, 746–759. <https://doi.org/10.1044/jshr.3604.746>
- Tyler, A. A., Gillon, G., Macrae, T., & Johnson, R. L. (2011). Direct and indirect effects of stimulating phoneme awareness vs. other linguistic skills in preschoolers with co-occurring speech and language impairments. *Topics in Language Disorders*, 31, 128–144. <https://doi.org/10.1097/TLD.0b013e318217d473>
- Tyler, A. A., Lewis, K. E., & Welch, C. M. (2003). Predictors of phonological change following intervention. *American Journal of Speech-Language Pathology*, 12, 289–298. [https://doi.org/10.1044/1058-0360\(2003/075\)](https://doi.org/10.1044/1058-0360(2003/075))
- Tyler, A. A., Lewis, K. E., Haskill, A., & Tolbert, L. C. (2002). Efficacy and cross-domain effects of a morphosyntax and a phonology intervention. *Language, Speech, and Hearing Services in Schools*, 33, 52–66. [https://doi.org/10.1044/0161-1461\(2002/005\)](https://doi.org/10.1044/0161-1461(2002/005))
- Tyler, A. A., Lewis, K. E., Haskill, A., & Tolbert, L. C. (2003). Outcomes of different speech and language goal attack strategies. *Journal of Speech, Language, and Hearing Research*, 46, 1077–1094. [https://doi.org/10.1044/1092-4388\(2003/085\)](https://doi.org/10.1044/1092-4388(2003/085))
- Tyler, A. A., Williams, M. J., & Lewis, K. E. (2006). Error consistency and the evaluation of treatment outcomes. *Clinical Linguistics & Phonetics*, 20(6), 411–422. <https://doi.org/10.1080/02699200500097769>
- Unicomb, R., Hewat, S., & Harrison, E. (2020). Treating children with co-occurring stuttering and speech sound disorder: A long-term follow up study. *Speech, Language and Hearing*, 1–13. <https://doi.org/10.1080/2050571X.2020.1801021>
- Unicomb, R., Hewat, S., Spencer, E., & Harrison, E. (2017). Evidence for the treatment of co-occurring stuttering and speech sound disorder: A clinical case series. *International Journal of Speech-Language Pathology*, 19(3), 251–264. <https://doi.org/10.1080/17549507.2017.1293735>
- Vanryckeghem, M., & Brutten, G. J. (2006). *KiddyCAT: Communication Attitude Test for Preschool and Kindergarten Children who Stutter*. Plural.
- Waters, D., Hawkes, C., & Burnett, E. (1998). Targeting speech processing strengths to facilitate pronunciation change. *International Journal of Language & Communication Disorders*, 33(Suppl.), 469–474. <https://doi.org/10.3109/13682829809179470>
- Weiner, F. (1981). Treatment of phonological disability using the method of meaningful minimal contrast: Two case studies. *Journal of Speech and Hearing Disorders*, 46(1), 97–103. <https://doi.org/10.1044/jshd.4601.97>
- Williams, A. L. (2000a). Multiple oppositions: Case studies of variables in phonological intervention. *American Journal of Speech-Language Pathology*, 9(4), 289–299. <https://doi.org/10.1044/1058-0360.0904.289>
- Williams, A. L. (2000b). Multiple oppositions: Theoretical foundations for an alternative contrastive intervention approach. *American Journal of Speech-Language Pathology*, 9(4), 282–288. <https://doi.org/10.1044/1058-0360.0904.282>

- Williams, A. L. (1991). Generalization patterns associated with training least phonological knowledge. *Journal of Speech and Hearing Research*, 34, 722–733. <https://doi.org/10.1044/jshr.3404.733>
- Williams, A. L. (2005). Assessment, target selection, and intervention: Dynamic interactions within a systemic perspective. *Topics in Language Disorders*, 25(3), 231–242. <https://doi.org/10.1097/00011363-200507000-00006>
- Williams, A. L. (2012). Intensity in phonological intervention: Is there a prescribed amount? *International Journal of Speech Language Pathology*, 14(5), 456–461. <https://doi.org/10.3109/17549507.2012.688866>
- Wolfe, V., Blocker, S. D., & Prater, N. J. (1988). Articulatory generalization in two word-medial, ambisyllabic contexts. *Language, Speech, and Hearing Services in Schools*, 19, 251–258. <https://doi.org/10.1044/0161-1461.1903.251>
- Wolfe, V., Presley, C., & Mesaris, J. (2003). The importance of sound identification training in phonological intervention. *American Journal of Speech-Language Pathology*, 12, 282–288. [https://doi.org/10.1044/1058-0360\(2003/074\)](https://doi.org/10.1044/1058-0360(2003/074))
- Wren, Y., Roulstone, S., Parkhouse, J., & Hall, B. (2001). A model for a mainstream school-based speech and language therapy service. *Child Language Teaching and Therapy*, 17(2), 107–126. <https://doi.org/10.1177/026565900101700202>
- Wren, Y., & Roulstone, S. (2008). A comparison between computer and tabletop delivery of phonology therapy. *International Journal of Speech-Language Pathology*, 10(5), 346–363. <https://doi.org/10.1080/17549500701873920>
- Yoder, P., Camarata, S., & Gardner, E. (2005). Treatment effects on speech intelligibility and length of utterance in children with specific language and intelligibility impairments. *Journal of Early Intervention*, 28, 34–49. <https://doi.org/10.1177/105381510502800105>
- Young, E. C. (1987). The effects of treatment on consonant cluster and weak syllable reduction processes in misarticulating children. *Language, Speech, and Hearing Services in Schools*, 18, 23–33. <https://doi.org/10.1044/0161-1461.1801.23>
