# Supplementary material
Source: publisher figshare collection journal article supplement (https://asha.figshare.com/articles/dataset/_/19497803)

**Supplemental Material S1.** 220 peer-reviewed published articles on interventions for children with phonological impairment: Publications per year.

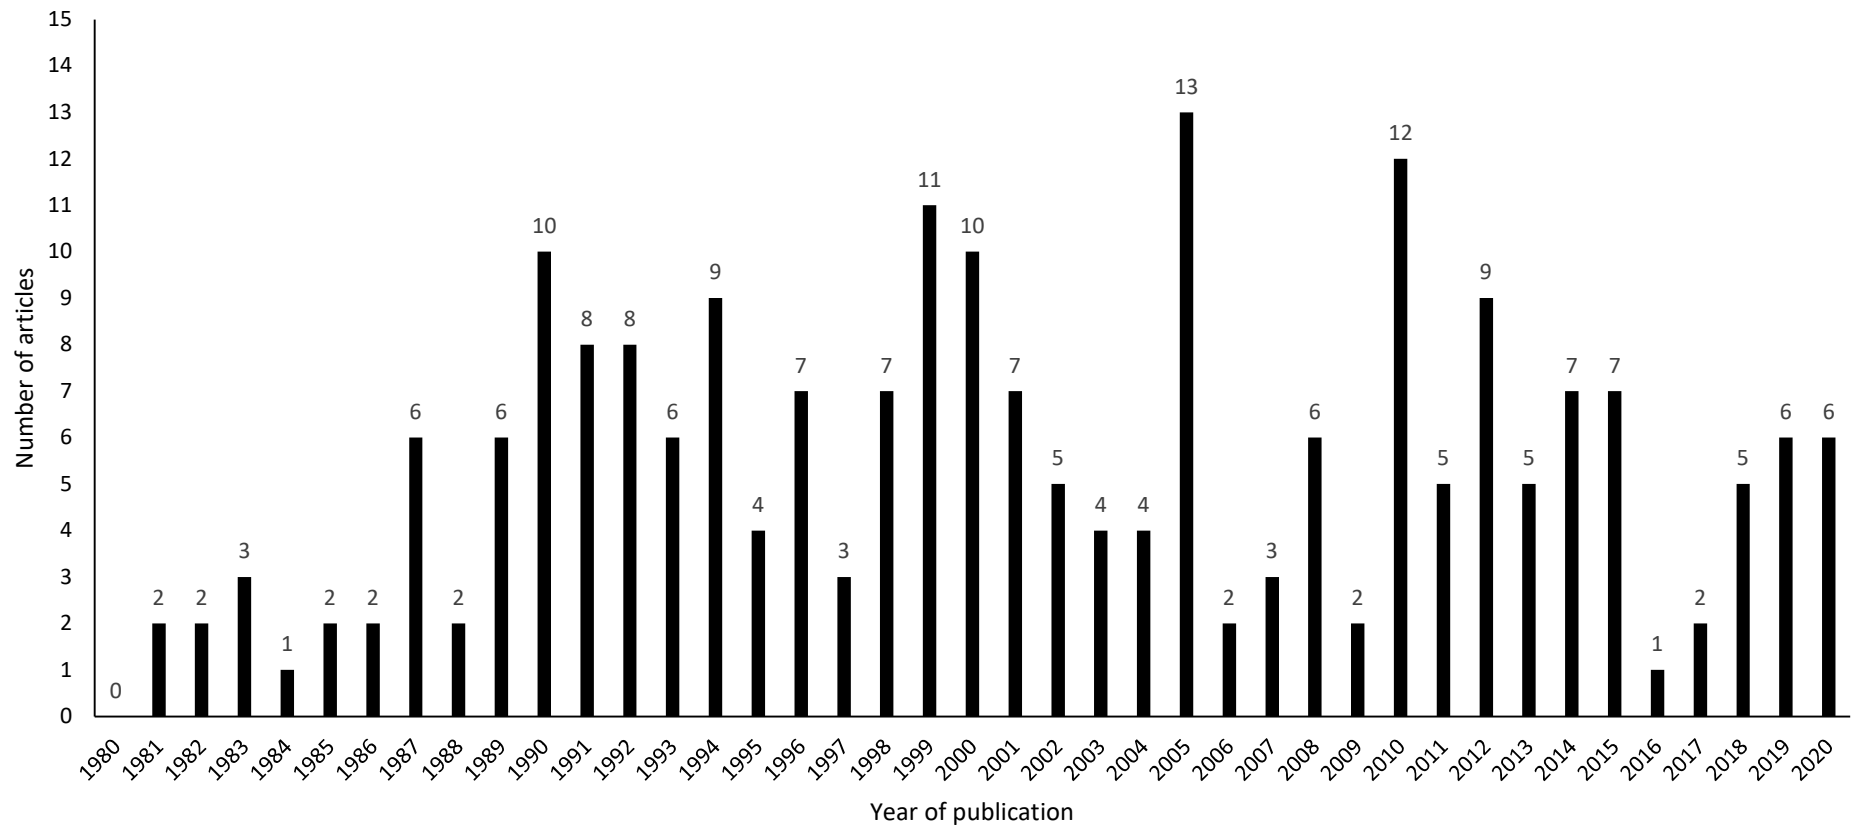

Supplement: Supplementary file 2 [file 1]
