# Supplementary material
Source: publisher figshare collection journal article supplement (https://asha.figshare.com/articles/dataset/_/19497803)
Supplement: Supplementary file 3 [file 1]

**Supplemental Material S3.** Articles reporting child engagement, and child-, parent- and clinician-reported experience measures.<sup>1</sup>

| Authors                      | Year | N   | Age<br>(min)    | Age<br>(max)    | Child<br>engagement | Child or<br>parent-<br>reported<br>experience | Clinician-<br>reported<br>experience |
|------------------------------|------|-----|-----------------|-----------------|---------------------|-----------------------------------------------|--------------------------------------|
| Broen & Westman              | 1990 | 20  | 43              | 60              |                     | X                                             |                                      |
| Culatta et al.               | 2005 | 1   | 69              | 69              | X                   |                                               |                                      |
| Eiserman et al.              | 1990 | 40  | 37              | 58              |                     | X                                             |                                      |
| Jarvis                       | 1989 | 1   | 57              | 57              |                     | X                                             |                                      |
| Kwiatkowski & Shriberg       | 1993 | 134 | 56 <sup>m</sup> | 56 <sup>m</sup> | X                   |                                               |                                      |
| Lousada et al.               | 2013 | 14  | 48              | 79              |                     | X                                             |                                      |
| McKean, Phillips, & Thompson | 2012 | 20  | 39              | 58              |                     | X                                             |                                      |
| McLeod et al.                | 2020 | 101 | 36              | 72              |                     | X                                             |                                      |
| Rudolph & Wendt              | 2014 | 3   | 51              | 63              |                     | X                                             |                                      |
| Ruscello et al.              | 1993 | 12  | 49              | 68              |                     | X                                             |                                      |
| Ruscello                     | 1995 | 36  | 96              | 144             |                     |                                               | X                                    |
| Rvachew & Bernhardt          | 2010 | 6   | 41              | 52              | X                   | X                                             |                                      |
| Rvachew & Nowak              | 2001 | 48  | 49              | 51              |                     | X                                             |                                      |
| Shriberg & Kwiatkowski       | 1982 | 31  | 46              | 108             |                     |                                               | X                                    |
| Shriberg & Kwiatkowski       | 1990 | 8   | 44              | 67              | X                   |                                               |                                      |
| Shriberg et al.              | 1989 | 18  | 42              | 105             | X                   | X                                             | X                                    |
| Shriberg et al.              | 1990 | 20  | 35              | 98              | X                   | X                                             | X                                    |
| Stringfellow & McLeod        | 1994 | 1   | 60              | 60              | X                   |                                               |                                      |
| Sugden et al.                | 2020 | 5   | 39              | 71              |                     | X                                             |                                      |
| Topbaş & Ünal                | 2010 | 2   | 72              | 72              |                     | X                                             | X                                    |

<sup>m</sup> =mean age

<sup>1</sup>The majority of articles reporting child engagement, child-, parent-, and/or clinician-reported experiences used an informal questionnaire/survey or collected anecdotal feedback. Specifically:

- Broen & Westman (1990): Informal "Parent Satisfaction Survey"
- Cullata et al. (2005): Informal description of engagement and participant in intervention sessions
- Eiserman et al. (1990): Informal "Parent Satisfaction Questionnaire"
- Jarvis (1989): Informal comment on child's experience of intervention
- Kwiatkowski & Shriberg (1993): Coding of child's engagement ('focus') during intervention based in retrospective clinical audit.
- Lousada et al. (2013): Informal parent questionnaire exploring the areas of "speech improvement, enjoyment of intervention sessions and the impact of intervention on intelligibility" (p. 178).
- Ruscello et al. (1993): Comments from parents about their child's experience of intervention ("parents also indicated that their children enjoyed using the system because of the attractiveness of the displays" p. 199).
- Ruscello (1995): Solicited comments from clinicians about providing the intervention.
- Rvachew & Bernhardt (2010): Informal child-friendly pictograph questionnaire on the intervention experience (e.g., "no fun at all" "lots of fun" p. 45), with anecdotal comments on child engagement in light of child's intervention experience.
- Rvachew & Nowak (2001): Informal pictograph questionnaire of child's degree of enjoyment during intervention sessions, and "department's standard Client Satisfaction Questionnaire" (p. 613) exploring parents' satisfaction with the intervention program and their child's progress.
- Shriberg & Kwiatkowski (1982): Informal questionnaire of clinician experience of providing intervention.
- Shriberg & Kwiatkowski (1990): Clinician observation of child and parent diary reports of child behaviors assumed to reflecting self-monitoring and therefore engagement in intervention process.
- Shriberg et al. (1989): Mean percent occurrence of child engagement behaviors from observation, comments from child participants about their preferred intervention session mode (none, tabletop, computer) based on their experience, and comments from clinicians about their experience and preference of modes of intervention (none, tabletop, computer).
- Shriberg et al. (1990): Percent occurrence of child engagement behaviors from observation, comments from child participants about their preferred intervention session mode (none, tabletop, computer) based on their experience, and comments from clinicians about their experience and preference of different modes of intervention (none, tabletop, computer).
- Stringfellow & McLeod (1994): Informal observations of the child's behavior.
- Topbaş & Ünal (2010): Social validation questionnaire completed by parents and clinicians about their views and experience of the intervention.

Four articles used published tools to explore the intervention experience: McKean et al. (2012), McLeod et al. (2020), Rudolph & Wendt (2014), and Sugden et al. (2020). The specific tools they used were as follows:

- McKean et al. (2012) used the *Measures of Processes of Care* (MPOC; King, Rosenbaum, & King, 1995).
- McLeod et al. (2020) adapted questions from the *Patient Enablement and Satisfaction Survey* (PESS; Australian Primary Health Care Research Institute, Australian National University [APHCRI], and the Australian Medicare Local Alliance [AMLA], 2012), and the questions from the *Family Empowerment Scale* (FES; Koren, DeChillo, & Friesen, 1992)
- Sugden et al. (2020) adapted a *Parent Confidence and Knowledge Scale for Stuttering* (Millard, Edwards, & Cook, 2009).
- Rudolf and Wendt (2014) used a revised version of the *Treatment Acceptability Rating Form* (TARF; Reimers & Wacker, 1988).

## References

- Australian Primary Health Care Research Institute, Australian National University, and the Australian Medicare Local Alliance. (2012). *Patient Enablement and Satisfaction Survey (PESS)*. Australian Medicare Local Alliance.
- Broen, P. A., & Westman, M. J. (1990). Project parent: A preschool speech program implemented through parents. *Journal of Speech and Hearing Disorders*, 55, 495–502. <https://doi.org/10.1044/jshd.5503.495>
- Culatta, B., Setzer, L. A., & Horn, D. (2005). Meaning-based intervention for a child with speech and language disorders. *Topics in Language Disorders*, 25(4), 388–401. [https://journals.lww.com/topicsinlanguagedisorders/Fulltext/2005/10000/Meaning\\_Based\\_Intervention\\_for\\_a\\_Child\\_With\\_Speech.13.aspx](https://journals.lww.com/topicsinlanguagedisorders/Fulltext/2005/10000/Meaning_Based_Intervention_for_a_Child_With_Speech.13.aspx)
- Eiserman, W. D., McCoun, M., & Escobar, C. M. (1990). A cost-effectiveness analysis of two alternative program models for serving speech-disordered preschoolers. *Journal of Early Intervention*, 14(4), 297–317. <https://doi.org/10.1177/105381519001400402>
- Farquharson, K., Tambyraja, S. R., & Justice, L. M. (2020). Contributions to gain in speech sound production accuracy for children with speech sound disorders: Exploring child and therapy factors. *Language, Speech, and Hearing Services in Schools*, 51(2), 457–468. [https://doi.org/10.1044/2019\\_LSHSS-19-00079](https://doi.org/10.1044/2019_LSHSS-19-00079)
- Jarvis, J. (1989). Taking a Metaphon approach to phonological development: A case study. *Child Language Teaching and Therapy*, 5(1), 16–32. <https://doi.org/10.1177/026565908900500102>
- King, S., Rosenbaum, P., & King, G. (1995). *The Measure of Process of Care MPOC*. Neurodevelopmental Clinical Research Unit, McMaster University.
- Koren, P. E., DeChillo, N., & Friesen, B. J. (1992). Measuring empowerment in families whose children have emotional disabilities: A brief questionnaire. *Rehabilitation Psychology*, 37, 305–321. <https://doi.org/10.1037/h0079106>
- Kwiatkowski, J., & Shriberg, L. D. (1993). Speech normalization in developmental phonological disorders. *Language, Speech, and Hearing Services in Schools*, 24(1), 10–18. <https://doi.org/10.1044/0161-1461.2401.10>
- Lousada, M., Jesus, L. M., Capelas, S., Margaça, C., Simões, D., Valente, A., Hall, A., & Joffe, V. L. (2013). Phonological and articulation treatment approaches in Portuguese children with speech and language impairments: A randomized controlled intervention study. *International Journal of Language & Communication Disorders*, 48(2), 172–187. <https://doi.org/10.1111/j.1460-6984.2012.00191.x>
- McKean, K., Phillips, B., & Thompson, A. (2012). A family-centred model of care in paediatric speech-language pathology. *International Journal of Speech Language Pathology*, 14(3), 235–246. <https://doi.org/10.3109/17549507.2011.604792>
- McLeod, S., Davis, E., Rohr, K., McGill, N., Miller, K., Roberts, A., Thornton, S., Ahio, N., & Ivory, N. (2020). Waiting for speech-language pathology services: A randomized controlled trial comparing therapy, advice and device. *International Journal of Speech-Language Pathology*, 22(3), 372–386. <https://doi.org/10.1080/17549507.2020.1731600>
- Rudolph, J. M., & Wendt, O. (2014). The efficacy of the cycles approach: A multiple baseline design. *Journal of Communication Disorders*, 47, 1–16. <https://doi.org/10.1016/j.jcomdis.2013.12.003>
- Ruscello, D. M. (1995). Speech appliances in the treatment of phonological disorders. *Journal of Communication Disorders*, 28(4), 331–353. [https://doi.org/10.1016/0021-9924\(95\)00060-8](https://doi.org/10.1016/0021-9924(95)00060-8)

- Ruscello, D. M., Cartwright, I. R., Haines, K. B., & Shuster, L. I. (1993). The use of different service delivery models for children with phonological disorders. *Journal of Communication Disorders*, 26, 193–203. [https://doi.org/10.1016/0021-9924\(93\)90008-X](https://doi.org/10.1016/0021-9924(93)90008-X)
- Millard, S. K., Edwards, S., & Cook, F. M. (2009). Parent–child interaction therapy: Adding to the evidence. *International Journal of Speech-Language Pathology*, 11(1), 61–76. <https://doi.org/10.1080/17549500802603895>
- Reimers, T. M., & Wacker, D. P. (1988). Parents' ratings of the acceptability of behavioral treatment recommendations made in an outpatient clinic: A preliminary analysis of the influence of treatment effectiveness. *Behavioral Disorders*, 14(1), 7–15. <https://doi.org/10.1177/019874298801400104>
- Rvachew, S., & Bernhardt, B. M. (2010). Clinical implications of dynamic systems theory for phonological development. *American Journal of Speech-Language Pathology*, 19, 34–50. [https://doi.org/10.1044/1058-0360\(2009/08-0047\)](https://doi.org/10.1044/1058-0360(2009/08-0047))
- Rvachew, S., & Nowak, M. (2001). The effect of target-selection strategy on phonological learning. *Journal of Speech, Language, and Hearing Research*, 44(3), 610–623. [https://doi.org/10.1044/1092-4388\(2001/050\)](https://doi.org/10.1044/1092-4388(2001/050))
- Shriberg, L. D., & Kwiatkowski, J. (1982). Phonological disorders II: A conceptual framework for management. *Journal of Speech and Hearing Disorders*, 47(3), 242–256. <https://doi.org/10.1044/jshd.4703.242>
- Shriberg, L. D., Kwiatkowski, J., & Snyder, T. (1989). Tabletop versus microcomputer-assisted speech management: Stabilization phase. *Journal of Speech and Hearing Disorders*, 54, 233–248. <https://doi.org/10.1044/jshd.5402.233>
- Shriberg, L. D., Kwiatkowski, J., & Snyder, T. (1990). Tabletop versus microcomputer assisted speech management: Response evocation phase. *Journal of Speech and Hearing Disorders*, 55, 635–655. <https://doi.org/10.1044/jshd.5504.635>
- Stringfellow, K., & McLeod, S. (1994). Using a facilitating phonetic context to reduce an unusual form of gliding. *Language, Speech, and Hearing Services in Schools*, 25, 191–193. <https://doi.org/10.1044/0161-1461.2503.191>
- Sugden, E., Baker, E., Williams, A. L., Munro, N., & Trivette, C. M. (2020). Evaluation of parent- and speech-language pathologist's delivered multiple oppositions intervention for children with phonological impairment: A multiple-baseline design study. *American Journal of Speech-Language Pathology*, 29(1), 111–126. [https://doi.org/10.1044/2019\\_AJSLP-18-0248](https://doi.org/10.1044/2019_AJSLP-18-0248)
- Topbaş, S., & Ünal, Ö. (2010). An alternating treatment comparison of minimal and maximal opposition sound selection in Turkish phonological disorders. *Clinical Linguistics & Phonetics*, 24(8), 646–668. <https://doi.org/10.3109/02699206.2010.486464>
